# Supplementary material for: Trends in hepatocellular carcinoma research from 2008 to 2017: a bibliometric analysis
Source: PeerJ. 2018 Aug 15;6:e5477. doi: 10.7717/peerj.5477 (PMC6098682; doi:10.7717/peerj.5477)
Supplement: Dataset S1 [file peerj-06-5477-s001.xlsx]

## Sheet: Sheet1
Source Titles	records	% of 24331
ONCOTARGET	852	3.502
PLOS ONE	794	3.263
WORLD JOURNAL OF GASTROENTEROLOGY	705	2.898
HEPATOLOGY	500	2.055
ONCOLOGY REPORTS	423	1.739
TUMOR BIOLOGY	413	1.697
HEPATOLOGY RESEARCH	365	1.5
ONCOLOGY LETTERS	351	1.443
JOURNAL OF HEPATOLOGY	327	1.344
HEPATO GASTROENTEROLOGY	283	1.163
JOURNAL OF GASTROENTEROLOGY AND HEPATOLOGY	279	1.147
LIVER INTERNATIONAL	265	1.089
CANCER LETTERS	259	1.064
SCIENTIFIC REPORTS	259	1.064
BMC CANCER	244	1.003
ANNALS OF SURGICAL ONCOLOGY	243	0.999
INTERNATIONAL JOURNAL OF ONCOLOGY	223	0.917
INTERNATIONAL JOURNAL OF CLINICAL AND EXPERIMENTAL PATHOLOGY	219	0.9
MOLECULAR MEDICINE REPORTS	210	0.863
BIOCHEMICAL AND BIOPHYSICAL RESEARCH COMMUNICATIONS	205	0.843
MEDICINE	205	0.843
ANTICANCER RESEARCH	199	0.818
JOURNAL OF VASCULAR AND INTERVENTIONAL RADIOLOGY	178	0.732
DIGESTIVE DISEASES AND SCIENCES	168	0.69
ASIAN PACIFIC JOURNAL OF CANCER PREVENTION	166	0.682
INTERNATIONAL JOURNAL OF CANCER	165	0.678
INTERNATIONAL JOURNAL OF CLINICAL AND EXPERIMENTAL MEDICINE	164	0.674
TRANSPLANTATION PROCEEDINGS	163	0.67
ONCOLOGY	148	0.608
MEDICAL ONCOLOGY	141	0.58
WORLD JOURNAL OF SURGERY	139	0.571
LIVER TRANSPLANTATION	135	0.555
CANCER SCIENCE	130	0.534
ONCOTARGETS AND THERAPY	130	0.534
AMERICAN JOURNAL OF ROENTGENOLOGY	122	0.501
CLINICAL CANCER RESEARCH	121	0.497
JOURNAL OF GASTROENTEROLOGY	120	0.493
BIOMEDICINE PHARMACOTHERAPY	119	0.489
CANCER RESEARCH	119	0.489
HEPATOBILIARY PANCREATIC DISEASES INTERNATIONAL	118	0.485
GASTROENTEROLOGY	117	0.481
JOURNAL OF SURGICAL ONCOLOGY	117	0.481
JOURNAL OF CANCER RESEARCH AND CLINICAL ONCOLOGY	115	0.473
CARDIOVASCULAR AND INTERVENTIONAL RADIOLOGY	113	0.464
EUROPEAN JOURNAL OF RADIOLOGY	111	0.456
CANCER	110	0.452
HEPATOLOGY INTERNATIONAL	110	0.452
RADIOLOGY	107	0.44
BIOMED RESEARCH INTERNATIONAL	103	0.423
DIGESTIVE AND LIVER DISEASE	103	0.423
JOURNAL OF EXPERIMENTAL CLINICAL CANCER RESEARCH	102	0.419
HPB	100	0.411
LIVER CANCER	100	0.411
EUROPEAN JOURNAL OF GASTROENTEROLOGY HEPATOLOGY	97	0.399
JOURNAL OF GASTROINTESTINAL SURGERY	96	0.395
INTERNATIONAL JOURNAL OF MOLECULAR SCIENCES	95	0.39
DIGESTIVE DISEASES	93	0.382
CARCINOGENESIS	91	0.374
BRITISH JOURNAL OF CANCER	89	0.366
EXPERIMENTAL AND THERAPEUTIC MEDICINE	88	0.362
WORLD JOURNAL OF SURGICAL ONCOLOGY	84	0.345
ONCOGENE	83	0.341
EUROPEAN RADIOLOGY	80	0.329
JOURNAL OF CLINICAL GASTROENTEROLOGY	73	0.3
MOLECULAR CANCER	70	0.288
SURGERY	70	0.288
ANNALS OF SURGERY	67	0.275
MOLECULAR AND CELLULAR BIOCHEMISTRY	66	0.271
JOURNAL OF BIOLOGICAL CHEMISTRY	65	0.267
CLINICS AND RESEARCH IN HEPATOLOGY AND GASTROENTEROLOGY	64	0.263
JOURNAL OF MAGNETIC RESONANCE IMAGING	63	0.259
ANNALS OF HEPATOLOGY	62	0.255
JOURNAL OF CANCER	61	0.251
JOURNAL OF SURGICAL RESEARCH	61	0.251
ALIMENTARY PHARMACOLOGY THERAPEUTICS	60	0.247
JOURNAL OF VIRAL HEPATITIS	60	0.247
MOLECULAR CARCINOGENESIS	60	0.247
CANCER CHEMOTHERAPY AND PHARMACOLOGY	59	0.242
CLINICAL GASTROENTEROLOGY AND HEPATOLOGY	59	0.242
EUROPEAN REVIEW FOR MEDICAL AND PHARMACOLOGICAL SCIENCES	59	0.242
CELLULAR PHYSIOLOGY AND BIOCHEMISTRY	58	0.238
JOURNAL OF HEPATO BILIARY PANCREATIC SCIENCES	58	0.238
CELL DEATH DISEASE	57	0.234
JOURNAL OF PROTEOME RESEARCH	56	0.23
EJSO	55	0.226
BMC GASTROENTEROLOGY	54	0.222
CHINESE MEDICAL JOURNAL	54	0.222
EUROPEAN JOURNAL OF CANCER	54	0.222
HEPATITIS MONTHLY	54	0.222
MOLECULAR BIOLOGY REPORTS	53	0.218
CLINICAL RADIOLOGY	52	0.214
GENETICS AND MOLECULAR RESEARCH	52	0.214
INTERNATIONAL JOURNAL OF RADIATION ONCOLOGY BIOLOGY PHYSICS	52	0.214
MOLECULAR CANCER THERAPEUTICS	51	0.21
AMERICAN JOURNAL OF CANCER RESEARCH	50	0.205
CANCER BIOLOGY THERAPY	50	0.205
GUT AND LIVER	50	0.205
INTERNAL MEDICINE	50	0.205
JOURNAL OF CLINICAL ONCOLOGY	50	0.205
SURGERY TODAY	50	0.205
GUT	49	0.201
HUMAN PATHOLOGY	48	0.197
INTERNATIONAL JOURNAL OF MOLECULAR MEDICINE	48	0.197
JOURNAL OF MEDICAL VIROLOGY	47	0.193
EUROPEAN JOURNAL OF PHARMACOLOGY	46	0.189
ONCOLOGIST	46	0.189
ABDOMINAL IMAGING	45	0.185
BRITISH JOURNAL OF SURGERY	45	0.185
JOURNAL OF CELLULAR BIOCHEMISTRY	44	0.181
CANCER CELL INTERNATIONAL	43	0.177
EVIDENCE BASED COMPLEMENTARY AND ALTERNATIVE MEDICINE	43	0.177
FUTURE ONCOLOGY	43	0.177
MEDICAL SCIENCE MONITOR	43	0.177
SCANDINAVIAN JOURNAL OF GASTROENTEROLOGY	43	0.177
INTERNATIONAL JOURNAL OF NANOMEDICINE	42	0.173
JOURNAL OF TRANSLATIONAL MEDICINE	42	0.173
KOREAN JOURNAL OF RADIOLOGY	42	0.173
NEOPLASMA	42	0.173
CANCER EPIDEMIOLOGY BIOMARKERS PREVENTION	41	0.169
JOURNAL OF COMPUTER ASSISTED TOMOGRAPHY	41	0.169
EXPERIMENTAL CELL RESEARCH	40	0.164
INVESTIGATIONAL NEW DRUGS	40	0.164
TRANSPLANTATION	40	0.164
AMERICAN JOURNAL OF GASTROENTEROLOGY	39	0.16
AMERICAN JOURNAL OF SURGERY	39	0.16
JAPANESE JOURNAL OF RADIOLOGY	39	0.16
MOLECULES	39	0.16
AMERICAN JOURNAL OF TRANSLATIONAL RESEARCH	38	0.156
BRITISH JOURNAL OF RADIOLOGY	38	0.156
JAPANESE JOURNAL OF CLINICAL ONCOLOGY	38	0.156
JOURNAL OF CANCER RESEARCH AND THERAPEUTICS	38	0.156
JOURNAL OF THE AMERICAN COLLEGE OF SURGEONS	38	0.156
PATHOLOGY ONCOLOGY RESEARCH	38	0.156
PATHOLOGY RESEARCH AND PRACTICE	38	0.156
CLINICS IN LIVER DISEASE	37	0.152
EXPERIMENTAL AND CLINICAL TRANSPLANTATION	36	0.148
JOURNAL OF AGRICULTURAL AND FOOD CHEMISTRY	36	0.148
JOURNAL OF BUON	36	0.148
ANTI CANCER DRUGS	35	0.144
CELL BIOCHEMISTRY AND BIOPHYSICS	35	0.144
ONCOLOGY RESEARCH	35	0.144
ACTA PHARMACOLOGICA SINICA	34	0.14
ANNALS OF ONCOLOGY	34	0.14
CANCER MEDICINE	34	0.14
CHINESE JOURNAL OF CANCER RESEARCH	34	0.14
FOOD AND CHEMICAL TOXICOLOGY	34	0.14
RADIATION ONCOLOGY	34	0.14
SURGICAL ENDOSCOPY AND OTHER INTERVENTIONAL TECHNIQUES	34	0.14
TOXICOLOGY IN VITRO	34	0.14
CHEMICO BIOLOGICAL INTERACTIONS	33	0.136
GENE	33	0.136
RSC ADVANCES	33	0.136
TOXICOLOGY LETTERS	33	0.136
ULTRASOUND IN MEDICINE AND BIOLOGY	33	0.136
BIOMATERIALS	32	0.132
CLINICAL TRANSPLANTATION	32	0.132
FEBS LETTERS	32	0.132
INTERNATIONAL JOURNAL OF BIOCHEMISTRY CELL BIOLOGY	32	0.132
INTERNATIONAL JOURNAL OF CLINICAL ONCOLOGY	32	0.132
JOURNAL OF HUAZHONG UNIVERSITY OF SCIENCE AND TECHNOLOGY MEDICAL SCIENCES	32	0.132
SEMINARS IN LIVER DISEASE	32	0.132
ACTA RADIOLOGICA	30	0.123
EXPERT REVIEW OF GASTROENTEROLOGY HEPATOLOGY	30	0.123
GASTROENTEROLOGY RESEARCH AND PRACTICE	30	0.123
JOURNAL OF GASTROINTESTINAL AND LIVER DISEASES	30	0.123
JOURNAL OF NUCLEAR MEDICINE	30	0.123
TUMORI	30	0.123
BIOCHEMICAL PHARMACOLOGY	29	0.119
DIAGNOSTIC PATHOLOGY	29	0.119
EXPERIMENTAL AND MOLECULAR PATHOLOGY	29	0.119
INTERNATIONAL JOURNAL OF HYPERTHERMIA	29	0.119
TOXICOLOGY AND APPLIED PHARMACOLOGY	29	0.119
ABDOMINAL RADIOLOGY	28	0.115
CANCER BIOMARKERS	28	0.115
LIFE SCIENCES	28	0.115
ANTI CANCER AGENTS IN MEDICINAL CHEMISTRY	27	0.111
JOURNAL OF KOREAN MEDICAL SCIENCE	27	0.111
LANGENBECKS ARCHIVES OF SURGERY	27	0.111
AMERICAN SURGEON	26	0.107
BIOLOGICAL PHARMACEUTICAL BULLETIN	26	0.107
CANCER EPIDEMIOLOGY	26	0.107
CANCER GENE THERAPY	26	0.107
CLINICAL TRANSLATIONAL ONCOLOGY	26	0.107
ACADEMIC RADIOLOGY	25	0.103
EXPERT REVIEW OF ANTICANCER THERAPY	25	0.103
JOURNAL OF CELLULAR AND MOLECULAR MEDICINE	25	0.103
JOURNAL OF ETHNOPHARMACOLOGY	25	0.103
PROCEEDINGS OF THE NATIONAL ACADEMY OF SCIENCES OF THE UNITED STATES OF AMERICA	25	0.103
TRANSLATIONAL CANCER RESEARCH	25	0.103
HISTOPATHOLOGY	24	0.099
JOURNAL OF PATHOLOGY	24	0.099
LABORATORY INVESTIGATION	24	0.099
PROTEOMICS	24	0.099
SEMINARS IN ONCOLOGY	24	0.099
TRANSPLANT INTERNATIONAL	24	0.099
AMERICAN JOURNAL OF CLINICAL ONCOLOGY CANCER CLINICAL TRIALS	23	0.095
AMERICAN JOURNAL OF TRANSPLANTATION	23	0.095
APOPTOSIS	23	0.095
BIOSCIENCE TRENDS	23	0.095
CURRENT CANCER DRUG TARGETS	23	0.095
INTERNATIONAL JOURNAL OF PHARMACEUTICS	23	0.095
ONCOIMMUNOLOGY	23	0.095
DIGESTIVE SURGERY	22	0.09
DISEASE MARKERS	22	0.09
INTERNATIONAL JOURNAL OF BIOLOGICAL SCIENCES	22	0.09
CANCER IMMUNOLOGY IMMUNOTHERAPY	21	0.086
CANCER INVESTIGATION	21	0.086
CLINICA CHIMICA ACTA	21	0.086
CLINICAL BIOCHEMISTRY	21	0.086
DIAGNOSTIC AND INTERVENTIONAL RADIOLOGY	21	0.086
DNA AND CELL BIOLOGY	21	0.086
JOURNAL OF CELLULAR PHYSIOLOGY	21	0.086
JOURNAL OF HEPATO BILIARY PANCREATIC SURGERY	21	0.086
NEOPLASIA	21	0.086
SURGICAL ONCOLOGY OXFORD	21	0.086
TECHNOLOGY IN CANCER RESEARCH TREATMENT	21	0.086
ACTA BIOCHIMICA ET BIOPHYSICA SINICA	20	0.082
AMERICAN JOURNAL OF PATHOLOGY	20	0.082
ANNALS OF TRANSPLANTATION	20	0.082
ASIAN PACIFIC JOURNAL OF TROPICAL MEDICINE	20	0.082
BIOMEDICAL RESEARCH INDIA	20	0.082
BMC COMPLEMENTARY AND ALTERNATIVE MEDICINE	20	0.082
CANCER BIOTHERAPY AND RADIOPHARMACEUTICALS	20	0.082
CELLULAR SIGNALLING	20	0.082
CLINICAL LABORATORY	20	0.082
HEPATOBILIARY SURGERY AND NUTRITION	20	0.082
INTERNATIONAL JOURNAL OF SURGERY	20	0.082
JOURNAL OF ULTRASOUND IN MEDICINE	20	0.082
MOLECULAR ONCOLOGY	20	0.082
NATURE COMMUNICATIONS	20	0.082
EUROPEAN JOURNAL OF NUCLEAR MEDICINE AND MOLECULAR IMAGING	19	0.078
INFECTIOUS AGENTS AND CANCER	19	0.078
INTERNATIONAL IMMUNOPHARMACOLOGY	19	0.078
INVESTIGATIVE RADIOLOGY	19	0.078
JOURNAL OF DIGESTIVE DISEASES	19	0.078
JOURNAL OF INTERNATIONAL MEDICAL RESEARCH	19	0.078
MODERN PATHOLOGY	19	0.078
NUTRITION AND CANCER AN INTERNATIONAL JOURNAL	19	0.078
PHYTOMEDICINE	19	0.078
RADIOTHERAPY AND ONCOLOGY	19	0.078
VIROLOGY JOURNAL	19	0.078
CANCER IMAGING	18	0.074
CELL BIOLOGY INTERNATIONAL	18	0.074
CLINICAL EXPERIMENTAL METASTASIS	18	0.074
DIGESTION	18	0.074
FREE RADICAL BIOLOGY AND MEDICINE	18	0.074
INTERNATIONAL JOURNAL OF MEDICAL SCIENCES	18	0.074
JOURNAL OF LAPAROENDOSCOPIC ADVANCED SURGICAL TECHNIQUES	18	0.074
JOURNAL OF MATERIALS CHEMISTRY B	18	0.074
TRANSLATIONAL ONCOLOGY	18	0.074
ANZ JOURNAL OF SURGERY	17	0.07
ASIA PACIFIC JOURNAL OF CLINICAL ONCOLOGY	17	0.07
CANCER CELL	17	0.07
CHINESE JOURNAL OF CANCER	17	0.07
CLINICAL IMAGING	17	0.07
CYTOKINE	17	0.07
EUROPEAN JOURNAL OF MEDICINAL CHEMISTRY	17	0.07
INTEGRATIVE CANCER THERAPIES	17	0.07
JOURNAL OF HEMATOLOGY ONCOLOGY	17	0.07
KAOHSIUNG JOURNAL OF MEDICAL SCIENCES	17	0.07
RADIOLOGIA MEDICA	17	0.07
YONSEI MEDICAL JOURNAL	17	0.07
AMERICAN JOURNAL OF SURGICAL PATHOLOGY	16	0.066
CANCER RESEARCH AND TREATMENT	16	0.066
EXPERIMENTAL BIOLOGY AND MEDICINE	16	0.066
INTERNATIONAL JOURNAL OF BIOLOGICAL MARKERS	16	0.066
JOURNAL OF PROTEOMICS	16	0.066
JOURNAL OF RADIATION RESEARCH	16	0.066
JOURNAL OF VIROLOGY	16	0.066
MAGNETIC RESONANCE IMAGING	16	0.066
MINERVA MEDICA	16	0.066
MOLECULAR CELLULAR PROTEOMICS	16	0.066
SURGICAL LAPAROSCOPY ENDOSCOPY PERCUTANEOUS TECHNIQUES	16	0.066
TOXICOLOGY	16	0.066
AMERICAN JOURNAL OF CHINESE MEDICINE	15	0.062
CANCER PREVENTION RESEARCH	15	0.062
CLINICAL CHEMISTRY AND LABORATORY MEDICINE	15	0.062
ENVIRONMENTAL TOXICOLOGY AND PHARMACOLOGY	15	0.062
GENETIC TESTING AND MOLECULAR BIOMARKERS	15	0.062
HUMAN IMMUNOLOGY	15	0.062
INTERVIROLOGY	15	0.062
JOURNAL OF CLINICAL INVESTIGATION	15	0.062
JOURNAL OF CLINICAL PATHOLOGY	15	0.062
LANCET ONCOLOGY	15	0.062
MOLECULAR PHARMACEUTICS	15	0.062
MOLECULAR THERAPY	15	0.062
ONCOGENESIS	15	0.062
PHYTOTHERAPY RESEARCH	15	0.062
ACS APPLIED MATERIALS INTERFACES	14	0.058
ACTA MEDICA OKAYAMA	14	0.058
ANNALS OF SURGICAL TREATMENT AND RESEARCH	14	0.058
APMIS	14	0.058
BIOORGANIC MEDICINAL CHEMISTRY LETTERS	14	0.058
BIOSCIENCE BIOTECHNOLOGY AND BIOCHEMISTRY	14	0.058
CURRENT ONCOLOGY	14	0.058
EUROPEAN JOURNAL OF CANCER PREVENTION	14	0.058
NANOMEDICINE NANOTECHNOLOGY BIOLOGY AND MEDICINE	14	0.058
MOLECULAR CANCER RESEARCH	14	0.058
NATURE GENETICS	14	0.058
TOHOKU JOURNAL OF EXPERIMENTAL MEDICINE	14	0.058
ULTRASCHALL IN DER MEDIZIN	14	0.058
VIRUS RESEARCH	14	0.058
AFRICAN JOURNAL OF TRADITIONAL COMPLEMENTARY AND ALTERNATIVE MEDICINES	13	0.053
BEST PRACTICE RESEARCH IN CLINICAL GASTROENTEROLOGY	13	0.053
CELL BIOCHEMISTRY AND FUNCTION	13	0.053
CHINESE JOURNAL OF INTEGRATIVE MEDICINE	13	0.053
COCHRANE DATABASE OF SYSTEMATIC REVIEWS	13	0.053
CURRENT PHARMACEUTICAL DESIGN	13	0.053
CYTOTECHNOLOGY	13	0.053
DIAGNOSTIC AND INTERVENTIONAL IMAGING	13	0.053
EUROPEAN JOURNAL OF MEDICAL RESEARCH	13	0.053
FRONTIERS OF MEDICINE	13	0.053
INDIAN JOURNAL OF CANCER	13	0.053
INTERNATIONAL SURGERY	13	0.053
JOURNAL OF CONTROLLED RELEASE	13	0.053
JOURNAL OF DRUG TARGETING	13	0.053
JOURNAL OF GENERAL VIROLOGY	13	0.053
PATHOLOGY INTERNATIONAL	13	0.053
SCIENTIFIC WORLD JOURNAL	13	0.053
AMERICAN JOURNAL OF THE MEDICAL SCIENCES	12	0.049
ARCHIVES OF SURGERY	12	0.049
BIOCHIMICA ET BIOPHYSICA ACTA GENERAL SUBJECTS	12	0.049
BIOCHIMICA ET BIOPHYSICA ACTA MOLECULAR CELL RESEARCH	12	0.049
DISCOVERY MEDICINE	12	0.049
DRUG DESIGN DEVELOPMENT AND THERAPY	12	0.049
JNCI JOURNAL OF THE NATIONAL CANCER INSTITUTE	12	0.049
JOURNAL OF CLINICAL LABORATORY ANALYSIS	12	0.049
JOURNAL OF GENE MEDICINE	12	0.049
JOURNAL OF THE CHINESE MEDICAL ASSOCIATION	12	0.049
LANCET	12	0.049
NATURE REVIEWS GASTROENTEROLOGY HEPATOLOGY	12	0.049
NUCLEAR MEDICINE COMMUNICATIONS	12	0.049
PHARMACEUTICAL BIOLOGY	12	0.049
TURKISH JOURNAL OF GASTROENTEROLOGY	12	0.049
VIRCHOWS ARCHIV	12	0.049
AMERICAN JOURNAL OF CLINICAL PATHOLOGY	11	0.045
AMERICAN JOURNAL OF PHYSIOLOGY GASTROINTESTINAL AND LIVER PHYSIOLOGY	11	0.045
CELL CYCLE	11	0.045
ENVIRONMENTAL TOXICOLOGY	11	0.045
EUROPEAN JOURNAL OF PHARMACEUTICAL SCIENCES	11	0.045
HUMAN GENE THERAPY	11	0.045
JOURNAL OF MEDICINAL FOOD	11	0.045
MOLECULAR NUTRITION FOOD RESEARCH	11	0.045
STRAHLENTHERAPIE UND ONKOLOGIE	11	0.045
SURGICAL ONCOLOGY CLINICS OF NORTH AMERICA	11	0.045
THERANOSTICS	11	0.045
ANATOMICAL RECORD ADVANCES IN INTEGRATIVE ANATOMY AND EVOLUTIONARY BIOLOGY	10	0.041
ARCHIVES OF TOXICOLOGY	10	0.041
ASIAN JOURNAL OF SURGERY	10	0.041
BASIC CLINICAL PHARMACOLOGY TOXICOLOGY	10	0.041
BIOTECHNOLOGY LETTERS	10	0.041
CANCER JOURNAL	10	0.041
CELLULAR AND MOLECULAR BIOLOGY	10	0.041
CHEMICAL RESEARCH IN TOXICOLOGY	10	0.041
CRITICAL REVIEWS IN ONCOLOGY HEMATOLOGY	10	0.041
DIAGNOSTIC CYTOPATHOLOGY	10	0.041
FEBS JOURNAL	10	0.041
FEBS OPEN BIO	10	0.041
GENE THERAPY	10	0.041
IMMUNOLOGY LETTERS	10	0.041
INTERNATIONAL JOURNAL OF BIOLOGICAL MACROMOLECULES	10	0.041
JOURNAL OF BIOMEDICAL NANOTECHNOLOGY	10	0.041
JOURNAL OF MEDICAL ULTRASONICS	10	0.041
JOURNAL OF MOLECULAR MEDICINE JMM	10	0.041
JOURNAL OF PINEAL RESEARCH	10	0.041
JOURNAL OF THE NATIONAL COMPREHENSIVE CANCER NETWORK	10	0.041
KOREAN JOURNAL OF INTERNAL MEDICINE	10	0.041
MEDICAL HYPOTHESES	10	0.041
MEDICAL ULTRASONOGRAPHY	10	0.041
MOLECULAR BIOSYSTEMS	10	0.041
NATURE	10	0.041
PHARMAZIE	10	0.041
PLANTA MEDICA	10	0.041
ZEITSCHRIFT FUR GASTROENTEROLOGIE	10	0.041
ANNALI ITALIANI DI CHIRURGIA	9	0.037
ARAB JOURNAL OF GASTROENTEROLOGY	9	0.037
ARCHIVES OF PATHOLOGY LABORATORY MEDICINE	9	0.037
AUTOPHAGY	9	0.037
BIOSCIENCE REPORTS	9	0.037
BMC GENOMICS	9	0.037
CANADIAN JOURNAL OF GASTROENTEROLOGY AND HEPATOLOGY	9	0.037
CANCER CAUSES CONTROL	9	0.037
CHINESE JOURNAL OF PHYSIOLOGY	9	0.037
CLINICAL EPIGENETICS	9	0.037
CELL	9	0.037
DRUG DELIVERY	9	0.037
EXPERIMENTAL AND MOLECULAR MEDICINE	9	0.037
EXPERT OPINION ON PHARMACOTHERAPY	9	0.037
FRONTIERS IN PHARMACOLOGY	9	0.037
INDIAN JOURNAL OF SURGERY	9	0.037
INFECTION GENETICS AND EVOLUTION	9	0.037
IUBMB LIFE	9	0.037
JOURNAL OF ASIAN NATURAL PRODUCTS RESEARCH	9	0.037
JOURNAL OF BIOMEDICAL SCIENCE	9	0.037
JOURNAL OF CLINICAL ULTRASOUND	9	0.037
JOURNAL OF MEDICAL IMAGING AND RADIATION ONCOLOGY	9	0.037
JOURNAL OF PHARMACOLOGY AND EXPERIMENTAL THERAPEUTICS	9	0.037
MARINE DRUGS	9	0.037
MOLECULAR IMAGING AND BIOLOGY	9	0.037
MOLECULAR PHARMACOLOGY	9	0.037
MUTATION RESEARCH GENETIC TOXICOLOGY AND ENVIRONMENTAL MUTAGENESIS	9	0.037
NANOTECHNOLOGY	9	0.037
NUCLEAR MEDICINE AND BIOLOGY	9	0.037
NUCLEIC ACIDS RESEARCH	9	0.037
PAKISTAN JOURNAL OF MEDICAL SCIENCES	9	0.037
PEDIATRIC TRANSPLANTATION	9	0.037
SAUDI JOURNAL OF GASTROENTEROLOGY	9	0.037
SEMINARS IN INTERVENTIONAL RADIOLOGY	9	0.037
SPRINGERPLUS	9	0.037
TARGETED ONCOLOGY	9	0.037
TROPICAL JOURNAL OF PHARMACEUTICAL RESEARCH	9	0.037
WORLD JOURNAL OF GASTROINTESTINAL ONCOLOGY	9	0.037
ACTA GASTRO ENTEROLOGICA BELGICA	8	0.033
ARCHIVES OF MEDICAL RESEARCH	8	0.033
ARCHIVES OF MEDICAL SCIENCE	8	0.033
BIOCHIMICA ET BIOPHYSICA ACTA MOLECULAR AND CELL BIOLOGY OF LIPIDS	8	0.033
BIOCHIMICA ET BIOPHYSICA ACTA PROTEINS AND PROTEOMICS	8	0.033
BIOCHIMICA ET BIOPHYSICA ACTA REVIEWS ON CANCER	8	0.033
BIOCHIMIE	8	0.033
BMB REPORTS	8	0.033
BMC MEDICAL GENOMICS	8	0.033
BRAZILIAN JOURNAL OF MEDICAL AND BIOLOGICAL RESEARCH	8	0.033
BULLETIN OF EXPERIMENTAL BIOLOGY AND MEDICINE	8	0.033
CANCER GENOMICS PROTEOMICS	8	0.033
CANCER TREATMENT REVIEWS	8	0.033
CELL AND BIOSCIENCE	8	0.033
CHEMOTHERAPY	8	0.033
CLINICAL HEMORHEOLOGY AND MICROCIRCULATION	8	0.033
CLINICAL NUCLEAR MEDICINE	8	0.033
ELECTROPHORESIS	8	0.033
FASEB JOURNAL	8	0.033
FOOD CHEMISTRY	8	0.033
FRONTIERS IN BIOSCIENCE LANDMARK	8	0.033
GENES CHROMOSOMES CANCER	8	0.033
GENOMICS	8	0.033
GLYCOBIOLOGY	8	0.033
HISTOLOGY AND HISTOPATHOLOGY	8	0.033
HUMAN EXPERIMENTAL TOXICOLOGY	8	0.033
INTERNATIONAL JOURNAL OF RADIATION BIOLOGY	8	0.033
JCPSP JOURNAL OF THE COLLEGE OF PHYSICIANS AND SURGEONS PAKISTAN	8	0.033
JOURNAL OF CLINICAL BIOCHEMISTRY AND NUTRITION	8	0.033
JOURNAL OF IMMUNOTHERAPY	8	0.033
JOURNAL OF NEURO ONCOLOGY	8	0.033
JOURNAL OF TRADITIONAL CHINESE MEDICINE	8	0.033
KOREAN JOURNAL OF PATHOLOGY	8	0.033
MOLECULAR MEDICINE	8	0.033
OMICS A JOURNAL OF INTEGRATIVE BIOLOGY	8	0.033
ONKOLOGIE	8	0.033
PHARMACOGNOSY MAGAZINE	8	0.033
ROMANIAN JOURNAL OF MORPHOLOGY AND EMBRYOLOGY	8	0.033
SCIENCE CHINA LIFE SCIENCES	8	0.033
UNITED EUROPEAN GASTROENTEROLOGY JOURNAL	8	0.033
ANNALS ACADEMY OF MEDICINE SINGAPORE	7	0.029
ANNALS OF DIAGNOSTIC PATHOLOGY	7	0.029
ANNALS OF NUCLEAR MEDICINE	7	0.029
ANTIVIRAL THERAPY	7	0.029
ARCHIVES OF VIROLOGY	7	0.029
ASIAN BIOMEDICINE	7	0.029
BIOCHEMICAL JOURNAL	7	0.029
BIOCHIMICA ET BIOPHYSICA ACTA MOLECULAR BASIS OF DISEASE	7	0.029
BIOCONJUGATE CHEMISTRY	7	0.029
BIOMACROMOLECULES	7	0.029
BIOMARKERS	7	0.029
BMJ OPEN	7	0.029
BRITISH JOURNAL OF PHARMACOLOGY	7	0.029
CANADIAN JOURNAL OF GASTROENTEROLOGY	7	0.029
CANCER GENETICS	7	0.029
CARBOHYDRATE POLYMERS	7	0.029
CELL BIOLOGY AND TOXICOLOGY	7	0.029
CELL DEATH AND DIFFERENTIATION	7	0.029
CELL PROLIFERATION	7	0.029
CELL REPORTS	7	0.029
CELLULAR ONCOLOGY	7	0.029
CHEMOSPHERE	7	0.029
CLINICAL DRUG INVESTIGATION	7	0.029
CLINICAL INFECTIOUS DISEASES	7	0.029
COLLOIDS AND SURFACES B BIOINTERFACES	7	0.029
EPIGENETICS	7	0.029
EXPERT OPINION ON INVESTIGATIONAL DRUGS	7	0.029
INTERNATIONAL JOURNAL OF CLINICAL PRACTICE	7	0.029
JOURNAL OF BIOCHEMICAL AND MOLECULAR TOXICOLOGY	7	0.029
JOURNAL OF BIOMEDICINE AND BIOTECHNOLOGY	7	0.029
JOURNAL OF CHEMOTHERAPY	7	0.029
JOURNAL OF INFECTIOUS DISEASES	7	0.029
JOURNAL OF NANOSCIENCE AND NANOTECHNOLOGY	7	0.029
JOURNAL OF NUTRITIONAL BIOCHEMISTRY	7	0.029
JOURNAL OF PHARMACY AND PHARMACOLOGY	7	0.029
JOURNAL OF THE FORMOSAN MEDICAL ASSOCIATION	7	0.029
JOURNAL OF THE NATIONAL CANCER INSTITUTE	7	0.029
LIPIDS IN HEALTH AND DISEASE	7	0.029
MOLECULAR CELLULAR TOXICOLOGY	7	0.029
MUTATION RESEARCH FUNDAMENTAL AND MOLECULAR MECHANISMS OF MUTAGENESIS	7	0.029
PATHOLOGY	7	0.029
SAUDI MEDICAL JOURNAL	7	0.029
SCANDINAVIAN JOURNAL OF CLINICAL LABORATORY INVESTIGATION	7	0.029
SEMINARS IN CANCER BIOLOGY	7	0.029
THERAPEUTICS AND CLINICAL RISK MANAGEMENT	7	0.029
ACTA BIOCHIMICA POLONICA	6	0.025
ACTA HISTOCHEMICA	6	0.025
ADVANCES IN EXPERIMENTAL MEDICINE AND BIOLOGY	6	0.025
AIDS	6	0.025
AMERICAN JOURNAL OF MEDICINE	6	0.025
AMINO ACIDS	6	0.025
ANALYST	6	0.025
ANALYTICAL AND BIOANALYTICAL CHEMISTRY	6	0.025
ANALYTICAL CHEMISTRY	6	0.025
ANNALS OF INTERNAL MEDICINE	6	0.025
ARCHIVES OF BIOCHEMISTRY AND BIOPHYSICS	6	0.025
BIOLOGICAL TRACE ELEMENT RESEARCH	6	0.025
BIOMATERIALS SCIENCE	6	0.025
BMC MEDICINE	6	0.025
BRATISLAVA MEDICAL JOURNAL BRATISLAVSKE LEKARSKE LISTY	6	0.025
CANCER CONTROL	6	0.025
CANCER GENETICS AND CYTOGENETICS	6	0.025
CANCER NURSING	6	0.025
CELL RESEARCH	6	0.025
CHEMICAL COMMUNICATIONS	6	0.025
CLINICAL AND EXPERIMENTAL MEDICINE	6	0.025
CURRENT MEDICINAL CHEMISTRY	6	0.025
CURRENT ONCOLOGY REPORTS	6	0.025
CURRENT OPINION IN ORGAN TRANSPLANTATION	6	0.025
DRUG METABOLISM AND DISPOSITION	6	0.025
EUROPEAN JOURNAL OF HISTOCHEMISTRY	6	0.025
EXPERT OPINION ON THERAPEUTIC TARGETS	6	0.025
FOOD FUNCTION	6	0.025
GASTROENTEROLOGIE CLINIQUE ET BIOLOGIQUE	6	0.025
GENES GENOMICS	6	0.025
GLYCOCONJUGATE JOURNAL	6	0.025
IMMUNOLOGICAL INVESTIGATIONS	6	0.025
INTERNATIONAL JOURNAL OF IMMUNOPATHOLOGY AND PHARMACOLOGY	6	0.025
JAMA JOURNAL OF THE AMERICAN MEDICAL ASSOCIATION	6	0.025
JAMA SURGERY	6	0.025
JOURNAL OF BIOLOGICAL REGULATORS AND HOMEOSTATIC AGENTS	6	0.025
JOURNAL OF BIOMATERIALS SCIENCE POLYMER EDITION	6	0.025
JOURNAL OF BIOMEDICAL MATERIALS RESEARCH PART A	6	0.025
JOURNAL OF INVESTIGATIVE SURGERY	6	0.025
JOURNAL OF LIPID RESEARCH	6	0.025
JOURNAL OF MOLECULAR HISTOLOGY	6	0.025
JOURNAL OF NUTRITIONAL SCIENCE AND VITAMINOLOGY	6	0.025
JOURNAL OF THE PAKISTAN MEDICAL ASSOCIATION	6	0.025
JOURNAL OF TOXICOLOGICAL SCIENCES	6	0.025
JOURNAL OF VETERINARY MEDICAL SCIENCE	6	0.025
JOURNAL OF ZHEJIANG UNIVERSITY SCIENCE B	6	0.025
LATIN AMERICAN JOURNAL OF PHARMACY	6	0.025
MACROMOLECULAR BIOSCIENCE	6	0.025
MEDICAL MOLECULAR MORPHOLOGY	6	0.025
NANOMEDICINE	6	0.025
NANOSCALE	6	0.025
NUTRIENTS	6	0.025
OXIDATIVE MEDICINE AND CELLULAR LONGEVITY	6	0.025
PHARMACOLOGY	6	0.025
PROTEOMICS CLINICAL APPLICATIONS	6	0.025
RADIATION RESEARCH	6	0.025
RADIOLOGY AND ONCOLOGY	6	0.025
SWISS MEDICAL WEEKLY	6	0.025
THERAPEUTIC ADVANCES IN GASTROENTEROLOGY	6	0.025
TOXICOLOGY MECHANISMS AND METHODS	6	0.025
ACTA ONCOLOGICA	5	0.021
AFRICAN HEALTH SCIENCES	5	0.021
AFRICAN JOURNAL OF BIOTECHNOLOGY	5	0.021
AFRICAN JOURNAL OF PHARMACY AND PHARMACOLOGY	5	0.021
ALCOHOLISM CLINICAL AND EXPERIMENTAL RESEARCH	5	0.021
ANALYTICA CHIMICA ACTA	5	0.021
ANALYTICAL METHODS	5	0.021
ANNALS OF CLINICAL AND LABORATORY SCIENCE	5	0.021
ANNALS OF THE NEW YORK ACADEMY OF SCIENCES	5	0.021
ANTIVIRAL RESEARCH	5	0.021
APPLIED IMMUNOHISTOCHEMISTRY MOLECULAR MORPHOLOGY	5	0.021
ARCHIVES OF PHARMACAL RESEARCH	5	0.021
BIO MEDICAL MATERIALS AND ENGINEERING	5	0.021
BIOCHEMISTRY AND CELL BIOLOGY BIOCHIMIE ET BIOLOGIE CELLULAIRE	5	0.021
BIOCHIP JOURNAL	5	0.021
BIOLOGICAL CHEMISTRY	5	0.021
BMC MEDICAL GENETICS	5	0.021
BMC SURGERY	5	0.021
BULLETIN DU CANCER	5	0.021
CANADIAN JOURNAL OF PHYSIOLOGY AND PHARMACOLOGY	5	0.021
CANCERS	5	0.021
CELLULAR MOLECULAR IMMUNOLOGY	5	0.021
CHEMICAL BIOLOGY DRUG DESIGN	5	0.021
CHINESE MEDICINE	5	0.021
CLINICAL CHEMISTRY	5	0.021
CLINICAL SCIENCE	5	0.021
CURRENT OPINION IN GASTROENTEROLOGY	5	0.021
DIGESTIVE ENDOSCOPY	5	0.021
EBIOMEDICINE	5	0.021
EUROPEAN JOURNAL OF PHARMACEUTICS AND BIOPHARMACEUTICS	5	0.021
EXCLI JOURNAL	5	0.021
FREE RADICAL RESEARCH	5	0.021
INTERNATIONAL JOURNAL OF INFECTIOUS DISEASES	5	0.021
JAMA ONCOLOGY	5	0.021
JOURNAL OF BIOENERGETICS AND BIOMEMBRANES	5	0.021
JOURNAL OF CELL SCIENCE	5	0.021
JOURNAL OF CLINICAL NEUROSCIENCE	5	0.021
JOURNAL OF ENVIRONMENTAL PATHOLOGY TOXICOLOGY AND ONCOLOGY	5	0.021
JOURNAL OF FUNCTIONAL FOODS	5	0.021
JOURNAL OF HAZARDOUS MATERIALS	5	0.021
JOURNAL OF IMMUNOLOGY	5	0.021
JOURNAL OF IMMUNOLOGY RESEARCH	5	0.021
JOURNAL OF KOREAN NEUROSURGICAL SOCIETY	5	0.021
JOURNAL OF MEDICINAL CHEMISTRY	5	0.021
JOURNAL OF NANOMATERIALS	5	0.021
JOURNAL OF NIPPON MEDICAL SCHOOL	5	0.021
JOURNAL OF ONCOLOGY PRACTICE	5	0.021
JOURNAL OF PHARMACEUTICAL SCIENCES	5	0.021
JOURNAL OF PHARMACOLOGICAL SCIENCES	5	0.021
JOVE JOURNAL OF VISUALIZED EXPERIMENTS	5	0.021
MAYO CLINIC PROCEEDINGS	5	0.021
METABOLOMICS	5	0.021
MINIMALLY INVASIVE THERAPY ALLIED TECHNOLOGIES	5	0.021
MOLECULAR AND CELLULAR BIOLOGY	5	0.021
MOLECULAR THERAPY NUCLEIC ACIDS	5	0.021
MOLECULES AND CELLS	5	0.021
NATURAL PRODUCT RESEARCH	5	0.021
NEW ENGLAND JOURNAL OF MEDICINE	5	0.021
NMR IN BIOMEDICINE	5	0.021
PANMINERVA MEDICA	5	0.021
PATHOBIOLOGY	5	0.021
PEPTIDES	5	0.021
POLYMER CHEMISTRY	5	0.021
PROTEIN AND PEPTIDE LETTERS	5	0.021
PROTEOME SCIENCE	5	0.021
SEMINARS IN RADIATION ONCOLOGY	5	0.021
SINGAPORE MEDICAL JOURNAL	5	0.021
TISSUE ANTIGENS	5	0.021
TOXICOLOGY RESEARCH	5	0.021
ACTA CYTOLOGICA	4	0.016
ACTA MEDICA MEDITERRANEA	4	0.016
AMERICAN JOURNAL OF EPIDEMIOLOGY	4	0.016
ANNALS OF EPIDEMIOLOGY	4	0.016
APPLIED BIOCHEMISTRY AND BIOTECHNOLOGY	4	0.016
APPLIED RADIATION AND ISOTOPES	4	0.016
BIOMARKERS IN MEDICINE	4	0.016
BIOMEDICAL AND ENVIRONMENTAL SCIENCES	4	0.016
BIOMEDICAL RESEARCH TOKYO	4	0.016
BIOORGANIC MEDICINAL CHEMISTRY	4	0.016
BIOTECHNOLOGY AND APPLIED BIOCHEMISTRY	4	0.016
BMC SYSTEMS BIOLOGY	4	0.016
CANADIAN ASSOCIATION OF RADIOLOGISTS JOURNAL JOURNAL DE L ASSOCIATION CANADIENNE DES RADIOLOGISTES	4	0.016
CANCER AND METASTASIS REVIEWS	4	0.016
CANCER DISCOVERY	4	0.016
CANCER MANAGEMENT AND RESEARCH	4	0.016
CELLULAR IMMUNOLOGY	4	0.016
CHINESE SCIENCE BULLETIN	4	0.016
CLINICAL AND INVESTIGATIVE MEDICINE	4	0.016
CLINICAL AND TRANSLATIONAL GASTROENTEROLOGY	4	0.016
CLINICAL IMMUNOLOGY	4	0.016
CLINICAL PROTEOMICS	4	0.016
COMPUTERIZED MEDICAL IMAGING AND GRAPHICS	4	0.016
CONTEMPORARY CLINICAL TRIALS	4	0.016
CONTRAST MEDIA MOLECULAR IMAGING	4	0.016
CRITICAL REVIEWS IN EUKARYOTIC GENE EXPRESSION	4	0.016
CURRENT GENE THERAPY	4	0.016
CURRENT MEDICAL RESEARCH AND OPINION	4	0.016
CURRENT PHARMACEUTICAL BIOTECHNOLOGY	4	0.016
CYTOTHERAPY	4	0.016
DRUG METABOLISM AND PHARMACOKINETICS	4	0.016
ENDOCRINE RELATED CANCER	4	0.016
EPIGENOMICS	4	0.016
EUROPEAN JOURNAL OF CLINICAL INVESTIGATION	4	0.016
EUROPEAN JOURNAL OF INTERNAL MEDICINE	4	0.016
EUROPEAN SURGICAL RESEARCH	4	0.016
EXPERIMENTAL AND TOXICOLOGIC PATHOLOGY	4	0.016
EXPERT OPINION ON DRUG DELIVERY	4	0.016
FITOTERAPIA	4	0.016
FOOD SCIENCE AND BIOTECHNOLOGY	4	0.016
FRONTIERS IN IMMUNOLOGY	4	0.016
FRONTIERS IN PHYSIOLOGY	4	0.016
FUTURE VIROLOGY	4	0.016
GASTROENTEROLOGY CLINICS OF NORTH AMERICA	4	0.016
GENES DEVELOPMENT	4	0.016
GROWTH FACTORS	4	0.016
IMMUNOTHERAPY	4	0.016
INDIAN JOURNAL OF PATHOLOGY AND MICROBIOLOGY	4	0.016
INTERNAL MEDICINE JOURNAL	4	0.016
INTERNATIONAL JOURNAL OF ENVIRONMENTAL RESEARCH AND PUBLIC HEALTH	4	0.016
INTERNATIONAL JOURNAL OF GERONTOLOGY	4	0.016
IRANIAN JOURNAL OF RADIOLOGY	4	0.016
JOURNAL FOR IMMUNOTHERAPY OF CANCER	4	0.016
JOURNAL OF ANIMAL AND VETERINARY ADVANCES	4	0.016
JOURNAL OF ANTIMICROBIAL CHEMOTHERAPY	4	0.016
JOURNAL OF APPLIED TOXICOLOGY	4	0.016
JOURNAL OF BIOSCIENCE AND BIOENGINEERING	4	0.016
JOURNAL OF BIOSCIENCES	4	0.016
JOURNAL OF CHROMATOGRAPHY B ANALYTICAL TECHNOLOGIES IN THE BIOMEDICAL AND LIFE SCIENCES	4	0.016
JOURNAL OF CLINICAL MEDICINE	4	0.016
JOURNAL OF CLINICAL VIROLOGY	4	0.016
JOURNAL OF COMPARATIVE PATHOLOGY	4	0.016
JOURNAL OF ENZYME INHIBITION AND MEDICINAL CHEMISTRY	4	0.016
JOURNAL OF EXPERIMENTAL MEDICINE	4	0.016
JOURNAL OF FOOD SCIENCE	4	0.016
JOURNAL OF HISTOCHEMISTRY CYTOCHEMISTRY	4	0.016
JOURNAL OF INTERFERON AND CYTOKINE RESEARCH	4	0.016
JOURNAL OF MEDICINAL PLANTS RESEARCH	4	0.016
JOURNAL OF NATURAL MEDICINES	4	0.016
JOURNAL OF PEDIATRIC GASTROENTEROLOGY AND NUTRITION	4	0.016
JOURNAL OF PEDIATRIC SURGERY	4	0.016
JOURNAL OF PEPTIDE SCIENCE	4	0.016
JOURNAL OF THE KOREAN SOCIETY FOR APPLIED BIOLOGICAL CHEMISTRY	4	0.016
JOURNAL OF THE KOREAN SURGICAL SOCIETY	4	0.016
JOURNAL OF THE SCIENCE OF FOOD AND AGRICULTURE	4	0.016
KOREAN JOURNAL OF PHYSIOLOGY PHARMACOLOGY	4	0.016
MAGNETIC RESONANCE IN MEDICAL SCIENCES	4	0.016
MEDICAL DOSIMETRY	4	0.016
MINERVA CHIRURGICA	4	0.016
MINI REVIEWS IN MEDICINAL CHEMISTRY	4	0.016
MOLECULAR AND CELLULAR ENDOCRINOLOGY	4	0.016
MOLECULAR BIOLOGY	4	0.016
MOLECULAR BIOLOGY OF THE CELL	4	0.016
MOLECULAR DIAGNOSIS THERAPY	4	0.016
MOLECULAR GENETICS AND METABOLISM	4	0.016
MOLECULAR IMMUNOLOGY	4	0.016
NANOSCALE RESEARCH LETTERS	4	0.016
NUKLEARMEDIZIN NUCLEAR MEDICINE	4	0.016
PEDIATRIC BLOOD CANCER	4	0.016
PEERJ	4	0.016
PHARMACOEPIDEMIOLOGY AND DRUG SAFETY	4	0.016
PHYSICS IN MEDICINE AND BIOLOGY	4	0.016
PLOS GENETICS	4	0.016
PROTEIN CELL	4	0.016
PSYCHO ONCOLOGY	4	0.016
QUALITY OF LIFE RESEARCH	4	0.016
RADIOGRAPHICS	4	0.016
RECENT PATENTS ON ANTI CANCER DRUG DISCOVERY	4	0.016
SCIENCE OF THE TOTAL ENVIRONMENT	4	0.016
SEMINARS IN NUCLEAR MEDICINE	4	0.016
TOXICOLOGIC PATHOLOGY	4	0.016
TOXICOLOGICAL SCIENCES	4	0.016
ULTRASONICS	4	0.016
VACCINE	4	0.016
VIRAL IMMUNOLOGY	4	0.016
VIROLOGY	4	0.016
VIRUSES BASEL	4	0.016
WSPOLCZESNA ONKOLOGIA CONTEMPORARY ONCOLOGY	4	0.016
YONAGO ACTA MEDICA	4	0.016
ACTA BIOMATERIALIA	3	0.012
ACTA PHARMACEUTICA	3	0.012
ACTA VIROLOGICA	3	0.012
ADVANCES IN CLINICAL AND EXPERIMENTAL MEDICINE	3	0.012
ADVANCES IN THERAPY	3	0.012
AGING US	3	0.012
AMERICAN JOURNAL OF DERMATOPATHOLOGY	3	0.012
AMERICAN JOURNAL OF PHYSIOLOGY CELL PHYSIOLOGY	3	0.012
ANALYTICAL AND QUANTITATIVE CYTOPATHOLOGY AND HISTOPATHOLOGY	3	0.012
ANALYTICAL CELLULAR PATHOLOGY	3	0.012
ANGIOGENESIS	3	0.012
ANNALS OF SAUDI MEDICINE	3	0.012
ANNALS OF THE ROYAL COLLEGE OF SURGEONS OF ENGLAND	3	0.012
ANTIOXIDANTS REDOX SIGNALING	3	0.012
ARCHIV DER PHARMAZIE	3	0.012
BIOCHEMISTRY MOSCOW	3	0.012
BIOCHIMICA ET BIOPHYSICA ACTA GENE REGULATORY MECHANISMS	3	0.012
BIOLOGICAL BASIS OF ALCOHOL INDUCED CANCER	3	0.012
BIOMETALS	3	0.012
BMC BIOCHEMISTRY	3	0.012
BRITISH JOURNAL OF NUTRITION	3	0.012
CANADIAN JOURNAL OF SURGERY	3	0.012
CANCER BIOLOGY MEDICINE	3	0.012
CANCER IMMUNOLOGY RESEARCH	3	0.012
CANCER RADIOTHERAPIE	3	0.012
CELL COMMUNICATION AND SIGNALING	3	0.012
CELL STRESS CHAPERONES	3	0.012
CENTRAL EUROPEAN JOURNAL OF MEDICINE	3	0.012
CHEMICAL RESEARCH IN CHINESE UNIVERSITIES	3	0.012
CHINESE JOURNAL OF NATURAL MEDICINES	3	0.012
CHIRURGIA	3	0.012
CHIRURGISCHE GASTROENTEROLOGIE	3	0.012
CLINICAL AND EXPERIMENTAL IMMUNOLOGY	3	0.012
CLINICAL DEVELOPMENTAL IMMUNOLOGY	3	0.012
CURRENT DRUG DELIVERY	3	0.012
CURRENT GENOMICS	3	0.012
CURRENT OPINION IN ONCOLOGY	3	0.012
DALTON TRANSACTIONS	3	0.012
DRUG DEVELOPMENT AND INDUSTRIAL PHARMACY	3	0.012
EJNMMI RESEARCH	3	0.012
ELECTROMAGNETIC BIOLOGY AND MEDICINE	3	0.012
ENDOCRINOLOGY	3	0.012
ENVIRONMENTAL HEALTH AND PREVENTIVE MEDICINE	3	0.012
ENVIRONMENTAL HEALTH PERSPECTIVES	3	0.012
ENVIRONMENTAL SCIENCE TECHNOLOGY	3	0.012
EUROPEAN JOURNAL OF CANCER CARE	3	0.012
EUROPEAN JOURNAL OF IMMUNOLOGY	3	0.012
EXPERT REVIEW OF MOLECULAR DIAGNOSTICS	3	0.012
FOLIA BIOLOGICA	3	0.012
GASTROENTEROLOGY NURSING	3	0.012
GASTROENTEROLOGY REPORT	3	0.012
GENOME RESEARCH	3	0.012
HIPPOKRATIA	3	0.012
HUMAN MOLECULAR GENETICS	3	0.012
HUMAN MUTATION	3	0.012
HYBRIDOMA	3	0.012
INDIAN JOURNAL OF MEDICAL RESEARCH	3	0.012
INTERACTIVE CARDIOVASCULAR AND THORACIC SURGERY	3	0.012
INTERNATIONAL JOURNAL OF CIRCUMPOLAR HEALTH	3	0.012
INTERNATIONAL JOURNAL OF EXPERIMENTAL PATHOLOGY	3	0.012
INTERNATIONAL JOURNAL OF PEPTIDE RESEARCH AND THERAPEUTICS	3	0.012
INTERNATIONAL JOURNAL OF TECHNOLOGY ASSESSMENT IN HEALTH CARE	3	0.012
IRISH JOURNAL OF MEDICAL SCIENCE	3	0.012
JAIDS JOURNAL OF ACQUIRED IMMUNE DEFICIENCY SYNDROMES	3	0.012
JOURNAL OF BIOMEDICAL MATERIALS RESEARCH PART B APPLIED BIOMATERIALS	3	0.012
JOURNAL OF ENVIRONMENTAL SCIENCES	3	0.012
JOURNAL OF EVALUATION IN CLINICAL PRACTICE	3	0.012
JOURNAL OF EXPOSURE SCIENCE AND ENVIRONMENTAL EPIDEMIOLOGY	3	0.012
JOURNAL OF INFECTION AND CHEMOTHERAPY	3	0.012
JOURNAL OF LIPOSOME RESEARCH	3	0.012
JOURNAL OF MATERIALS SCIENCE MATERIALS IN MEDICINE	3	0.012
JOURNAL OF MEDICAL IMAGING AND HEALTH INFORMATICS	3	0.012
JOURNAL OF MEMBRANE BIOLOGY	3	0.012
JOURNAL OF MOLECULAR CELL BIOLOGY	3	0.012
JOURNAL OF NANOBIOTECHNOLOGY	3	0.012
JOURNAL OF NANOPARTICLE RESEARCH	3	0.012
JOURNAL OF NUTRITION	3	0.012
JOURNAL OF ORAL AND MAXILLOFACIAL SURGERY	3	0.012
JOURNAL OF PEDIATRIC HEMATOLOGY ONCOLOGY	3	0.012
JOURNAL OF RECEPTORS AND SIGNAL TRANSDUCTION	3	0.012
JOURNAL OF VIROLOGICAL METHODS	3	0.012
JOURNAL OF VISCERAL SURGERY	3	0.012
JOURNAL OF ZOO AND WILDLIFE MEDICINE	3	0.012
LIFE SCIENCE JOURNAL ACTA ZHENGZHOU UNIVERSITY OVERSEAS EDITION	3	0.012
LANGMUIR	3	0.012
MEDICAL PRINCIPLES AND PRACTICE	3	0.012
MEDICINAL CHEMISTRY RESEARCH	3	0.012
MOLECULAR GENETICS AND GENOMICS	3	0.012
MOLECULAR THERAPY ONCOLYTICS	3	0.012
NANO RESEARCH	3	0.012
NATURAL PRODUCT COMMUNICATIONS	3	0.012
NATURE CELL BIOLOGY	3	0.012
NAUNYN SCHMIEDEBERGS ARCHIVES OF PHARMACOLOGY	3	0.012
NETHERLANDS JOURNAL OF MEDICINE	3	0.012
NUTRITION JOURNAL	3	0.012
ONCOLOGY RESEARCH AND TREATMENT	3	0.012
OPEN MEDICINE	3	0.012
PEDIATRIC RADIOLOGY	3	0.012
PHARMACEUTICAL RESEARCH	3	0.012
PHARMACOLOGICAL RESEARCH	3	0.012
PHARMACOLOGY THERAPEUTICS	3	0.012
PLOS MEDICINE	3	0.012
PPAR RESEARCH	3	0.012
QJM AN INTERNATIONAL JOURNAL OF MEDICINE	3	0.012
QUARTERLY JOURNAL OF NUCLEAR MEDICINE AND MOLECULAR IMAGING	3	0.012
RADIATION MEDICINE	3	0.012
RAPID COMMUNICATIONS IN MASS SPECTROMETRY	3	0.012
RESEARCH IN VETERINARY SCIENCE	3	0.012
SEMINARS IN DIAGNOSTIC PATHOLOGY	3	0.012
SEMINARS IN ROENTGENOLOGY	3	0.012
SOUTH AFRICAN JOURNAL OF SURGERY	3	0.012
SOUTHERN MEDICAL JOURNAL	3	0.012
SPINE	3	0.012
STEM CELLS	3	0.012
STEM CELLS AND DEVELOPMENT	3	0.012
STEM CELLS INTERNATIONAL	3	0.012
STEROIDS	3	0.012
SURGICAL CLINICS OF NORTH AMERICA	3	0.012
THERAPEUTIC ADVANCES IN MEDICAL ONCOLOGY	3	0.012
THROMBOSIS RESEARCH	3	0.012
TRANSLATIONAL RESEARCH	3	0.012
TRANSPLANTATION REVIEWS	3	0.012
TRIALS	3	0.012
ULTRASOUND QUARTERLY	3	0.012
UPSALA JOURNAL OF MEDICAL SCIENCES	3	0.012
VIROLOGICA SINICA	3	0.012
WIENER KLINISCHE WOCHENSCHRIFT	3	0.012
ACS BIOMATERIALS SCIENCE ENGINEERING	2	0.008
ACS NANO	2	0.008
ACTA CHIRURGICA BELGICA	2	0.008
ACTA CLINICA BELGICA	2	0.008
ACTA MEDICA PORTUGUESA	2	0.008
ADVANCED FUNCTIONAL MATERIALS	2	0.008
ADVANCES IN ANATOMIC PATHOLOGY	2	0.008
AFRICAN JOURNAL OF MICROBIOLOGY RESEARCH	2	0.008
AGING CLINICAL AND EXPERIMENTAL RESEARCH	2	0.008
ALCOHOL	2	0.008
ANESTHESIA AND ANALGESIA	2	0.008
ANNALS OF CLINICAL BIOCHEMISTRY	2	0.008
ANNALS OF MEDICINE	2	0.008
ANNALS OF VASCULAR SURGERY	2	0.008
APPLIED MICROBIOLOGY AND BIOTECHNOLOGY	2	0.008
APPLIED PHYSICS LETTERS	2	0.008
ARCHIVES OF IRANIAN MEDICINE	2	0.008
ARCHIVUM IMMUNOLOGIAE ET THERAPIAE EXPERIMENTALIS	2	0.008
ARTIFICIAL CELLS NANOMEDICINE AND BIOTECHNOLOGY	2	0.008
ARTIFICIAL ORGANS	2	0.008
ASIA PACIFIC JOURNAL OF CLINICAL NUTRITION	2	0.008
ASIAN JOURNAL OF CHEMISTRY	2	0.008
ATHEROSCLEROSIS	2	0.008
BIOCHEMISTRY AND CELL BIOLOGY	2	0.008
BIOFACTORS	2	0.008
BIOLOGIA	2	0.008
BIOLOGICAL RESEARCH	2	0.008
BIOLOGICAL RHYTHM RESEARCH	2	0.008
BIOLOGY OF THE CELL	2	0.008
BIOMEDICAL CHROMATOGRAPHY	2	0.008
BIOSENSORS BIOELECTRONICS	2	0.008
BIOTECHNOLOGY AND BIOENGINEERING	2	0.008
BIOTECHNOLOGY AND BIOPROCESS ENGINEERING	2	0.008
BIOTECHNOLOGY BIOTECHNOLOGICAL EQUIPMENT	2	0.008
BIOTECHNOLOGY JOURNAL	2	0.008
BMC BIOINFORMATICS	2	0.008
BMC CELL BIOLOGY	2	0.008
BRITISH JOURNAL OF BIOMEDICAL SCIENCE	2	0.008
BULLETIN OF PHARMACEUTICAL SCIENCES	2	0.008
BULLETIN OF THE KOREAN CHEMICAL SOCIETY	2	0.008
BULLETIN OF THE VETERINARY INSTITUTE IN PULAWY	2	0.008
CANADIAN VETERINARY JOURNAL REVUE VETERINAIRE CANADIENNE	2	0.008
CLINICS	2	0.008
CELL JOURNAL	2	0.008
CELL TRANSPLANTATION	2	0.008
CELLULAR MICROBIOLOGY	2	0.008
CHEMISTRY CENTRAL JOURNAL	2	0.008
CHEMMEDCHEM	2	0.008
CHROMATOGRAPHIA	2	0.008
CLINICAL AND EXPERIMENTAL DERMATOLOGY	2	0.008
CLINICAL AND EXPERIMENTAL PHARMACOLOGY AND PHYSIOLOGY	2	0.008
CLINICAL THERAPEUTICS	2	0.008
COMPUTATIONAL AND MATHEMATICAL METHODS IN MEDICINE	2	0.008
COMPUTER METHODS AND PROGRAMS IN BIOMEDICINE	2	0.008
CRYOBIOLOGY	2	0.008
CURRENT DRUG TARGETS	2	0.008
CURRENT MEDICAL IMAGING REVIEWS	2	0.008
CURRENT OPINION IN HIV AND AIDS	2	0.008
CURRENT SCIENCE	2	0.008
CURRENT TREATMENT OPTIONS IN ONCOLOGY	2	0.008
CYTOJOURNAL	2	0.008
CYTOLOGIA	2	0.008
CYTOMETRY PART A	2	0.008
CYTOPATHOLOGY	2	0.008
DEUTSCHES ARZTEBLATT INTERNATIONAL	2	0.008
DIABETES METABOLISM RESEARCH AND REVIEWS	2	0.008
DIAGNOSTIC MOLECULAR PATHOLOGY	2	0.008
DRUG DEVELOPMENT RESEARCH	2	0.008
DRUGS	2	0.008
ELIFE	2	0.008
EMBO JOURNAL	2	0.008
EMBO MOLECULAR MEDICINE	2	0.008
ENDOCRINE JOURNAL	2	0.008
ENVIRONMENTAL HEALTH	2	0.008
ENVIRONMENTAL RESEARCH	2	0.008
ENVIRONMENTAL TOXICOLOGY AND CHEMISTRY	2	0.008
EPIDEMIOLOGY	2	0.008
EUROPEAN JOURNAL OF CARDIO THORACIC SURGERY	2	0.008
EUROPEAN JOURNAL OF CELL BIOLOGY	2	0.008
EUROPEAN JOURNAL OF CLINICAL MICROBIOLOGY INFECTIOUS DISEASES	2	0.008
EUROPEAN JOURNAL OF EPIDEMIOLOGY	2	0.008
EUROPEAN JOURNAL OF ONCOLOGY	2	0.008
EUROPEAN JOURNAL OF ONCOLOGY NURSING	2	0.008
EUROPEAN JOURNAL OF PEDIATRIC SURGERY	2	0.008
EXPERT OPINION ON EMERGING DRUGS	2	0.008
EXPERT OPINION ON ORPHAN DRUGS	2	0.008
FOOD NUTRITION RESEARCH	2	0.008
FUNDAMENTAL CLINICAL PHARMACOLOGY	2	0.008
FUTURE MICROBIOLOGY	2	0.008
GENERAL PHYSIOLOGY AND BIOPHYSICS	2	0.008
GENES TO CELLS	2	0.008
GENETICS AND MOLECULAR BIOLOGY	2	0.008
GENOME BIOLOGY	2	0.008
GENOME MEDICINE	2	0.008
GERIATRICS GERONTOLOGY INTERNATIONAL	2	0.008
HELLENIC JOURNAL OF NUCLEAR MEDICINE	2	0.008
HONG KONG MEDICAL JOURNAL	2	0.008
HUMAN CELL	2	0.008
HUMAN VACCINES IMMUNOTHERAPEUTICS	2	0.008
IMMUNOBIOLOGY	2	0.008
IMMUNOPHARMACOLOGY AND IMMUNOTOXICOLOGY	2	0.008
IN VITRO CELLULAR DEVELOPMENTAL BIOLOGY ANIMAL	2	0.008
INDUSTRIAL CROPS AND PRODUCTS	2	0.008
INTERDISCIPLINARY SCIENCES COMPUTATIONAL LIFE SCIENCES	2	0.008
INTERNATIONAL JOURNAL OF ARTIFICIAL ORGANS	2	0.008
INTERNATIONAL JOURNAL OF CLINICAL PHARMACOLOGY AND THERAPEUTICS	2	0.008
INTERNATIONAL JOURNAL OF COLORECTAL DISEASE	2	0.008
INTERNATIONAL JOURNAL OF DERMATOLOGY	2	0.008
INTERNATIONAL JOURNAL OF HEMATOLOGY	2	0.008
INTERNATIONAL JOURNAL OF MEDICINAL MUSHROOMS	2	0.008
INTERNATIONAL JOURNAL OF SURGICAL PATHOLOGY	2	0.008
INVESTIGACION CLINICA	2	0.008
IRANIAN JOURNAL OF BASIC MEDICAL SCIENCES	2	0.008
IRANIAN JOURNAL OF PHARMACEUTICAL RESEARCH	2	0.008
JAVMA JOURNAL OF THE AMERICAN VETERINARY MEDICAL ASSOCIATION	2	0.008
JBR BTR	2	0.008
JOURNAL OF ALTERNATIVE AND COMPLEMENTARY MEDICINE	2	0.008
JOURNAL OF APPLIED CLINICAL MEDICAL PHYSICS	2	0.008
JOURNAL OF APPLIED POLYMER SCIENCE	2	0.008
JOURNAL OF BIOMATERIALS AND TISSUE ENGINEERING	2	0.008
JOURNAL OF CELL COMMUNICATION AND SIGNALING	2	0.008
JOURNAL OF CHROMATOGRAPHY A	2	0.008
JOURNAL OF CLINICAL PHARMACY AND THERAPEUTICS	2	0.008
JOURNAL OF CYTOLOGY	2	0.008
JOURNAL OF DIABETES RESEARCH	2	0.008
JOURNAL OF ENDOCRINOLOGY	2	0.008
JOURNAL OF ENVIRONMENTAL SCIENCE AND HEALTH PART C ENVIRONMENTAL CARCINOGENESIS ECOTOXICOLOGY REVIEWS	2	0.008
JOURNAL OF EPIDEMIOLOGY	2	0.008
JOURNAL OF EVOLUTIONARY BIOCHEMISTRY AND PHYSIOLOGY	2	0.008
JOURNAL OF HETEROCYCLIC CHEMISTRY	2	0.008
JOURNAL OF HISTOTECHNOLOGY	2	0.008
JOURNAL OF MICROBIOLOGY AND BIOTECHNOLOGY	2	0.008
JOURNAL OF MINIMAL ACCESS SURGERY	2	0.008
JOURNAL OF NATURAL PRODUCTS	2	0.008
JOURNAL OF NEPAL MEDICAL ASSOCIATION	2	0.008
JOURNAL OF NEURO OPHTHALMOLOGY	2	0.008
JOURNAL OF OBSTETRICS AND GYNAECOLOGY	2	0.008
JOURNAL OF ONCOLOGY	2	0.008
JOURNAL OF PAIN AND SYMPTOM MANAGEMENT	2	0.008
JOURNAL OF PALLIATIVE CARE	2	0.008
JOURNAL OF PALLIATIVE MEDICINE	2	0.008
JOURNAL OF PEDIATRICS	2	0.008
JOURNAL OF PHARMACEUTICAL AND BIOMEDICAL ANALYSIS	2	0.008
JOURNAL OF PHOTOCHEMISTRY AND PHOTOBIOLOGY B BIOLOGY	2	0.008
JOURNAL OF PHYSIOLOGY AND BIOCHEMISTRY	2	0.008
JOURNAL OF POLYMER SCIENCE PART A POLYMER CHEMISTRY	2	0.008
JOURNAL OF PURE AND APPLIED MICROBIOLOGY	2	0.008
JOURNAL OF RADIOANALYTICAL AND NUCLEAR CHEMISTRY	2	0.008
JOURNAL OF RESEARCH IN MEDICAL SCIENCES	2	0.008
JOURNAL OF SMALL ANIMAL PRACTICE	2	0.008
JOURNAL OF STEROID BIOCHEMISTRY AND MOLECULAR BIOLOGY	2	0.008
JOURNAL OF THE KOREAN PHYSICAL SOCIETY	2	0.008
JOURNAL OF THORACIC IMAGING	2	0.008
JOURNAL OF TOXICOLOGY AND ENVIRONMENTAL HEALTH PART A CURRENT ISSUES	2	0.008
JOURNAL OF TRACE ELEMENTS IN MEDICINE AND BIOLOGY	2	0.008
JOURNAL OF WUHAN UNIVERSITY OF TECHNOLOGY MATERIALS SCIENCE EDITION	2	0.008
LASERS IN MEDICAL SCIENCE	2	0.008
LIPIDS	2	0.008
MAGNETIC RESONANCE IMAGING CLINICS OF NORTH AMERICA	2	0.008
MATERIALS SCIENCE ENGINEERING C MATERIALS FOR BIOLOGICAL APPLICATIONS	2	0.008
MEDIATORS OF INFLAMMATION	2	0.008
MEDICAL CLINICS OF NORTH AMERICA	2	0.008
MEDICINAL CHEMISTRY	2	0.008
METALLOMICS	2	0.008
MICRON	2	0.008
MITOCHONDRION	2	0.008
MOLECULAR ASPECTS OF MEDICINE	2	0.008
MOLECULAR BIOTECHNOLOGY	2	0.008
MOLECULAR ENDOCRINOLOGY	2	0.008
MOLECULAR IMAGING	2	0.008
MOLECULAR SYSTEMS BIOLOGY	2	0.008
MUTAGENESIS	2	0.008
MUTATION RESEARCH REVIEWS IN MUTATION RESEARCH	2	0.008
NANOMATERIALS	2	0.008
NANOSCIENCE AND NANOTECHNOLOGY LETTERS	2	0.008
NANOTOXICOLOGY	2	0.008
NATURAL COMPOUNDS AND THEIR ROLE IN APOPTOTIC CELL SIGNALING PATHWAYS	2	0.008
NATURE MEDICINE	2	0.008
NATURE REVIEWS CLINICAL ONCOLOGY	2	0.008
NEW JOURNAL OF CHEMISTRY	2	0.008
NIGERIAN JOURNAL OF CLINICAL PRACTICE	2	0.008
NUCLEAR INSTRUMENTS METHODS IN PHYSICS RESEARCH SECTION B BEAM INTERACTIONS WITH MATERIALS AND ATOMS	2	0.008
NUCLEIC ACID THERAPEUTICS	2	0.008
NUTRITION RESEARCH	2	0.008
ONCOLOGY NEW YORK	2	0.008
OPEN LIFE SCIENCES	2	0.008
OPHTHALMIC PLASTIC AND RECONSTRUCTIVE SURGERY	2	0.008
ORAL ONCOLOGY	2	0.008
ORGANIC BIOMOLECULAR CHEMISTRY	2	0.008
PAKISTAN JOURNAL OF PHARMACEUTICAL SCIENCES	2	0.008
PARASITOLOGY RESEARCH	2	0.008
PARTICLE PARTICLE SYSTEMS CHARACTERIZATION	2	0.008
PATHOLOGIE BIOLOGIE	2	0.008
PEDIATRIC AND DEVELOPMENTAL PATHOLOGY	2	0.008
PEDIATRIC RESEARCH	2	0.008
PERSONALIZED MEDICINE	2	0.008
PHOTODIAGNOSIS AND PHOTODYNAMIC THERAPY	2	0.008
PHYTOCHEMISTRY LETTERS	2	0.008
PLATELETS	2	0.008
PLOS NEGLECTED TROPICAL DISEASES	2	0.008
POSTGRADUATE MEDICAL JOURNAL	2	0.008
PROGRESS IN BIOCHEMISTRY AND BIOPHYSICS	2	0.008
PROGRESS IN TRANSPLANTATION	2	0.008
PUERTO RICO HEALTH SCIENCES JOURNAL	2	0.008
RADIOLOGIC CLINICS OF NORTH AMERICA	2	0.008
REDOX BIOLOGY	2	0.008
REDOX REPORT	2	0.008
REVISTA ESPANOLA DE ENFERMEDADES DIGESTIVAS	2	0.008
SAO PAULO MEDICAL JOURNAL	2	0.008
SAUDI JOURNAL OF BIOLOGICAL SCIENCES	2	0.008
SCANDINAVIAN JOURNAL OF IMMUNOLOGY	2	0.008
SCANDINAVIAN JOURNAL OF SURGERY	2	0.008
SCIENCE IN CHINA SERIES C LIFE SCIENCES	2	0.008
SCIENCE SIGNALING	2	0.008
SCIENCE TRANSLATIONAL MEDICINE	2	0.008
SEMINARS IN IMMUNOPATHOLOGY	2	0.008
SEMINARS IN ULTRASOUND CT AND MRI	2	0.008
SOUTH AFRICAN JOURNAL OF BOTANY	2	0.008
SRPSKI ARHIV ZA CELOKUPNO LEKARSTVO	2	0.008
STEROID ENZYMES AND CANCER	2	0.008
SUPPORTIVE CARE IN CANCER	2	0.008
SURGEON JOURNAL OF THE ROYAL COLLEGES OF SURGEONS OF EDINBURGH AND IRELAND	2	0.008
SURGICAL AND RADIOLOGIC ANATOMY	2	0.008
TALANTA	2	0.008
THEORETICAL BIOLOGY AND MEDICAL MODELLING	2	0.008
TISSUE ENGINEERING PART A	2	0.008
TOXICOLOGICAL AND ENVIRONMENTAL CHEMISTRY	2	0.008
TOXICON	2	0.008
TURKISH JOURNAL OF BIOLOGY	2	0.008
TURKISH JOURNAL OF MEDICAL SCIENCES	2	0.008
ULTRASTRUCTURAL PATHOLOGY	2	0.008
UROLOGY	2	0.008
VETERINARY CLINICAL PATHOLOGY	2	0.008
VETERINARY PARASITOLOGY	2	0.008
VETERINARY PATHOLOGY	2	0.008
VISZERALMEDIZIN	2	0.008
WEST INDIAN MEDICAL JOURNAL	2	0.008
WORLD JOURNAL OF CLINICAL CASES	2	0.008
XENOBIOTICA	2	0.008
ZYGOTE	2	0.008
AAPS PHARMSCITECH	1	0.004
ACS CENTRAL SCIENCE	1	0.004
ACS CHEMICAL BIOLOGY	1	0.004
ACS MEDICINAL CHEMISTRY LETTERS	1	0.004
ACTA CIRURGICA BRASILEIRA	1	0.004
ACTA DERMATO VENEREOLOGICA	1	0.004
ACTA HAEMATOLOGICA	1	0.004
ACTA HISTOCHEMICA ET CYTOCHEMICA	1	0.004
ACTA NATURAE	1	0.004
ACTA PHARMACEUTICA SINICA B	1	0.004
ACTA POLONIAE PHARMACEUTICA	1	0.004
ACTA TROPICA	1	0.004
ACTA VETERINARIA BRNO	1	0.004
ACTA VETERINARIA HUNGARICA	1	0.004
ADVANCED DRUG DELIVERY REVIEWS	1	0.004
ADVANCED HEALTHCARE MATERIALS	1	0.004
ADVANCED MATERIALS	1	0.004
ADVANCED SCIENCE	1	0.004
ADVANCES IN CANCER BIOMARKERS FROM BIOCHEMISTRY TO CLINIC FOR A CRITICAL REVISION	1	0.004
ADVANCES IN CANCER RESEARCH	1	0.004
ADVANCES IN CANCER RESEARCH VOL 108	1	0.004
ADVANCES IN NUTRITION	1	0.004
ADVANCES IN TNF FAMILY RESEARCH	1	0.004
AGING CELL	1	0.004
AIDS PATIENT CARE AND STDS	1	0.004
AMERICAN JOURNAL OF CARDIOLOGY	1	0.004
AMERICAN JOURNAL OF HUMAN GENETICS	1	0.004
AMERICAN JOURNAL OF PHYSIOLOGY ENDOCRINOLOGY AND METABOLISM	1	0.004
AMERICAN JOURNAL OF RESPIRATORY AND CRITICAL CARE MEDICINE	1	0.004
AMYLOID JOURNAL OF PROTEIN FOLDING DISORDERS	1	0.004
ANALYTICAL BIOCHEMISTRY	1	0.004
ANALYTICAL LETTERS	1	0.004
ANALYTICAL SCIENCES	1	0.004
ANATOMICAL SCIENCE INTERNATIONAL	1	0.004
ANDROLOGIA	1	0.004
ANESTHESIOLOGY	1	0.004
ANGEWANDTE CHEMIE INTERNATIONAL EDITION	1	0.004
ANNALES D ENDOCRINOLOGIE	1	0.004
ANNALS OF DERMATOLOGY	1	0.004
ANNALS OF GLOBAL HEALTH	1	0.004
ANNALS OF LABORATORY MEDICINE	1	0.004
ANNALS OF THORACIC AND CARDIOVASCULAR SURGERY	1	0.004
ANNALS OF THORACIC SURGERY	1	0.004
ANNUAL REVIEW OF MEDICINE	1	0.004
ANTIMICROBIAL AGENTS AND CHEMOTHERAPY	1	0.004
APPLIED CLAY SCIENCE	1	0.004
APPLIED MAGNETIC RESONANCE	1	0.004
APPLIED ORGANOMETALLIC CHEMISTRY	1	0.004
APPLIED PHYSIOLOGY NUTRITION AND METABOLISM PHYSIOLOGIE APPLIQUEE NUTRITION ET METABOLISME	1	0.004
APPLIED SURFACE SCIENCE	1	0.004
ARCHIVES OF BIOLOGICAL SCIENCES	1	0.004
ARCHIVES OF GERONTOLOGY AND GERIATRICS	1	0.004
ARCHIVES OF PHYSIOLOGY AND BIOCHEMISTRY	1	0.004
ARQUIVOS BRASILEIROS DE ENDOCRINOLOGIA E METABOLOGIA	1	0.004
ARTIFICIAL CELLS BLOOD SUBSTITUTES AND BIOTECHNOLOGY	1	0.004
ASIA PACIFIC JOURNAL OF PUBLIC HEALTH	1	0.004
AUSTRALIAN AND NEW ZEALAND JOURNAL OF PUBLIC HEALTH	1	0.004
AUSTRALIAN DENTAL JOURNAL	1	0.004
BALKAN JOURNAL OF MEDICAL GENETICS	1	0.004
BANGLADESH JOURNAL OF PHARMACOLOGY	1	0.004
BIOANALYSIS	1	0.004
BIOCELL	1	0.004
BIOCHEMICAL ENGINEERING JOURNAL	1	0.004
BIOCHEMICAL GENETICS	1	0.004
BIOELECTROMAGNETICS	1	0.004
BIOINFORMATICS	1	0.004
BIOLOGY BULLETIN	1	0.004
BIOLOGY OPEN	1	0.004
BIOMEDICAL ENGINEERING APPLICATIONS BASIS COMMUNICATIONS	1	0.004
BIOMEDICAL JOURNAL	1	0.004
BIOMEDICAL OPTICS EXPRESS	1	0.004
BIOMEDICAL PAPERS OLOMOUC	1	0.004
BIOMOLECULES THERAPEUTICS	1	0.004
BIOPHARMACEUTICS DRUG DISPOSITION	1	0.004
BIOPOLYMERS	1	0.004
BIOTECHNIC HISTOCHEMISTRY	1	0.004
BLOOD	1	0.004
BLOOD COAGULATION FIBRINOLYSIS	1	0.004
BLOOD PURIFICATION	1	0.004
BMC BIOLOGY	1	0.004
BMC INFECTIOUS DISEASES	1	0.004
BMC MEDICAL IMAGING	1	0.004
BMC PHARMACOLOGY TOXICOLOGY	1	0.004
BMC PUBLIC HEALTH	1	0.004
BMC UROLOGY	1	0.004
BOSNIAN JOURNAL OF BASIC MEDICAL SCIENCES	1	0.004
BRACHYTHERAPY	1	0.004
BRAIN AND BEHAVIOR	1	0.004
BRAZILIAN JOURNAL OF INFECTIOUS DISEASES	1	0.004
BRITISH JOURNAL OF HAEMATOLOGY	1	0.004
BRITISH JOURNAL OF HOSPITAL MEDICINE	1	0.004
BRITISH JOURNAL OF ORAL MAXILLOFACIAL SURGERY	1	0.004
BRITISH JOURNAL OF SPORTS MEDICINE	1	0.004
BRITISH MEDICAL JOURNAL	1	0.004
BUFFALO BULLETIN	1	0.004
BURNS	1	0.004
CA A CANCER JOURNAL FOR CLINICIANS	1	0.004
CANADIAN JOURNAL OF INFECTIOUS DISEASES MEDICAL MICROBIOLOGY	1	0.004
CANCER DETECTION AND PREVENTION	1	0.004
CARDIOLOGY IN THE YOUNG	1	0.004
CELL ADHESION MIGRATION	1	0.004
CELL CHEMICAL BIOLOGY	1	0.004
CELLULAR AND MOLECULAR LIFE SCIENCES	1	0.004
CELLULAR MOLECULAR BIOLOGY LETTERS	1	0.004
CHEMBIOCHEM	1	0.004
CHEMICAL PHARMACEUTICAL BULLETIN	1	0.004
CHEMICAL SCIENCE	1	0.004
CHEMISTRY AN ASIAN JOURNAL	1	0.004
CHEMISTRY LETTERS	1	0.004
CHEMOMETRICS AND INTELLIGENT LABORATORY SYSTEMS	1	0.004
CHEST	1	0.004
CHINESE JOURNAL OF ANALYTICAL CHEMISTRY	1	0.004
CHINESE JOURNAL OF INORGANIC CHEMISTRY	1	0.004
CHINESE OPTICS LETTERS	1	0.004
CHRONOBIOLOGY INTERNATIONAL	1	0.004
CIRCULATING NUCLEIC ACIDS IN SERUM AND PLASMA CNAPS IX	1	0.004
CIRUGIA Y CIRUJANOS	1	0.004
CLEVELAND CLINIC JOURNAL OF MEDICINE	1	0.004
CLINICA TERAPEUTICA	1	0.004
CLINICAL AND APPLIED THROMBOSIS HEMOSTASIS	1	0.004
CLINICAL AND EXPERIMENTAL NEPHROLOGY	1	0.004
CLINICAL AND VACCINE IMMUNOLOGY	1	0.004
CLINICAL COLORECTAL CANCER	1	0.004
CLINICAL ENDOCRINOLOGY	1	0.004
CLINICAL GENETICS	1	0.004
CLINICAL INTERVENTIONS IN AGING	1	0.004
CLINICAL JOURNAL OF ONCOLOGY NURSING	1	0.004
CLINICAL MEDICINE	1	0.004
CLINICAL MICROBIOLOGY AND INFECTION	1	0.004
CLINICAL NUTRITION	1	0.004
CLINICAL ONCOLOGY	1	0.004
CLINICAL PHARMACOKINETICS	1	0.004
CLINICAL REVIEWS IN ALLERGY IMMUNOLOGY	1	0.004
COLD SPRING HARBOR PERSPECTIVES IN MEDICINE	1	0.004
COLLOIDS AND SURFACES A PHYSICOCHEMICAL AND ENGINEERING ASPECTS	1	0.004
COMPARATIVE BIOCHEMISTRY AND PHYSIOLOGY C TOXICOLOGY PHARMACOLOGY	1	0.004
COMPARATIVE MEDICINE	1	0.004
COMPTES RENDUS DE L ACADEMIE BULGARE DES SCIENCES	1	0.004
COMPUTER AIDED SURGERY	1	0.004
COMPUTERS IN BIOLOGY AND MEDICINE	1	0.004
CONGENITAL HEART DISEASE	1	0.004
CRITICAL CARE MEDICINE	1	0.004
CURRENT BIOINFORMATICS	1	0.004
CURRENT COMPUTER AIDED DRUG DESIGN	1	0.004
CURRENT DIABETES REPORTS	1	0.004
CURRENT DRUG METABOLISM	1	0.004
CURRENT MOLECULAR MEDICINE	1	0.004
CURRENT NANOSCIENCE	1	0.004
CURRENT OPINION IN IMMUNOLOGY	1	0.004
CURRENT OPINION IN INVESTIGATIONAL DRUGS	1	0.004
CURRENT OPINION IN VIROLOGY	1	0.004
CURRENT PROBLEMS IN SURGERY	1	0.004
CURRENT PROTEIN PEPTIDE SCIENCE	1	0.004
CURRENT PROTEOMICS	1	0.004
CURRENT TOPICS IN MEDICINAL CHEMISTRY	1	0.004
CYTA JOURNAL OF FOOD	1	0.004
DATABASE THE JOURNAL OF BIOLOGICAL DATABASES AND CURATION	1	0.004
DEVELOPMENTAL DYNAMICS	1	0.004
DIABETES	1	0.004
DIABETES METABOLISM JOURNAL	1	0.004
DIABETES RESEARCH AND CLINICAL PRACTICE	1	0.004
DIABETOLOGIA	1	0.004
DIAGNOSTIC MICROBIOLOGY AND INFECTIOUS DISEASE	1	0.004
DISEASES OF AQUATIC ORGANISMS	1	0.004
DISEASES OF THE COLON RECTUM	1	0.004
DNA REPAIR	1	0.004
DOKLADY BIOCHEMISTRY AND BIOPHYSICS	1	0.004
DOSE RESPONSE	1	0.004
DRUG AND CHEMICAL TOXICOLOGY	1	0.004
DRUG DELIVERY AND TRANSLATIONAL RESEARCH	1	0.004
DRUG DISCOVERY TODAY	1	0.004
DRUG TESTING AND ANALYSIS	1	0.004
DRUGS OF THE FUTURE	1	0.004
EASTERN MEDITERRANEAN HEALTH JOURNAL	1	0.004
ECHOCARDIOGRAPHY A JOURNAL OF CARDIOVASCULAR ULTRASOUND AND ALLIED TECHNIQUES	1	0.004
EJC SUPPLEMENTS	1	0.004
ELECTROANALYSIS	1	0.004
ELECTROCHEMISTRY COMMUNICATIONS	1	0.004
ENDOCRINE PATHOLOGY	1	0.004
ENDOSCOPIC ULTRASOUND	1	0.004
ENDOSCOPY	1	0.004
ENVIRONMENTAL AND MOLECULAR MUTAGENESIS	1	0.004
ENVIRONMENTAL POLLUTION	1	0.004
ENVIRONMENTAL SCIENCE AND POLLUTION RESEARCH	1	0.004
ENVIRONMENTAL SCIENCE PROCESSES IMPACTS	1	0.004
ETHIOPIAN JOURNAL OF HEALTH DEVELOPMENT	1	0.004
ETHNICITY DISEASE	1	0.004
EUROPEAN CYTOKINE NETWORK	1	0.004
EUROPEAN JOURNAL OF CLINICAL NUTRITION	1	0.004
EUROPEAN JOURNAL OF HUMAN GENETICS	1	0.004
EUROPEAN JOURNAL OF INFLAMMATION	1	0.004
EUROPEAN JOURNAL OF INORGANIC CHEMISTRY	1	0.004
EUROPEAN JOURNAL OF MASS SPECTROMETRY	1	0.004
EUROPEAN JOURNAL OF MEDICAL GENETICS	1	0.004
EUROPEAN JOURNAL OF NUTRITION	1	0.004
EXPERIMENTAL ANIMALS	1	0.004
EXPERIMENTAL HEMATOLOGY	1	0.004
EXPERIMENTAL PARASITOLOGY	1	0.004
EXPERT OPINION ON DRUG METABOLISM TOXICOLOGY	1	0.004
EXPERT OPINION ON DRUG SAFETY	1	0.004
EXPERT REVIEW OF PHARMACOECONOMICS OUTCOMES RESEARCH	1	0.004
EXPERT REVIEW OF PROTEOMICS	1	0.004
EXPLORE THE JOURNAL OF SCIENCE AND HEALING	1	0.004
FARMACIA	1	0.004
FERTILITY AND STERILITY	1	0.004
FOLIA HISTOCHEMICA ET CYTOBIOLOGICA	1	0.004
FOOD ADDITIVES AND CONTAMINANTS PART A CHEMISTRY ANALYSIS CONTROL EXPOSURE RISK ASSESSMENT	1	0.004
FRONTIERS IN BIOSCIENCE	1	0.004
FRONTIERS IN CHEMISTRY	1	0.004
FRONTIERS IN LIFE SCIENCE	1	0.004
FRONTIERS IN MICROBIOLOGY	1	0.004
FRONTIERS IN ONCOLOGY	1	0.004
FUNCTIONAL INTEGRATIVE GENOMICS	1	0.004
GASTROENTEROLOGIA Y HEPATOLOGIA	1	0.004
GASTROINTESTINAL ENDOSCOPY	1	0.004
GENE EXPRESSION	1	0.004
GENES AND IMMUNITY	1	0.004
GENES AND NUTRITION	1	0.004
GENETIC TESTING	1	0.004
GENETICS RESEARCH	1	0.004
GENOMICS PROTEOMICS BIOINFORMATICS	1	0.004
GERODONTOLOGY	1	0.004
GRAEFES ARCHIVE FOR CLINICAL AND EXPERIMENTAL OPHTHALMOLOGY	1	0.004
GROWTH HORMONE IGF RESEARCH	1	0.004
HAEMATOLOGICA THE HEMATOLOGY JOURNAL	1	0.004
HAEMOPHILIA	1	0.004
HEALTH AND QUALITY OF LIFE OUTCOMES	1	0.004
HEALTH TECHNOLOGY ASSESSMENT	1	0.004
HEART LUNG AND CIRCULATION	1	0.004
HEMOGLOBIN	1	0.004
HETEROCYCLES	1	0.004
HETEROCYCLIC COMMUNICATIONS	1	0.004
HISTOCHEMISTRY AND CELL BIOLOGY	1	0.004
HUMAN GENE THERAPY METHODS	1	0.004
HUMAN GENETICS	1	0.004
HUMAN REPRODUCTION UPDATE	1	0.004
IDRUGS	1	0.004
IEEE ACM TRANSACTIONS ON COMPUTATIONAL BIOLOGY AND BIOINFORMATICS	1	0.004
IEEE TRANSACTIONS ON BIOMEDICAL ENGINEERING	1	0.004
IEEE TRANSACTIONS ON NUCLEAR SCIENCE	1	0.004
IET SYSTEMS BIOLOGY	1	0.004
IMMUNOGENETICS	1	0.004
IMMUNOLOGY AND CELL BIOLOGY	1	0.004
INDIAN JOURNAL OF BIOTECHNOLOGY	1	0.004
INDIAN JOURNAL OF EXPERIMENTAL BIOLOGY	1	0.004
INDIAN JOURNAL OF PHARMACEUTICAL EDUCATION AND RESEARCH	1	0.004
INDIAN JOURNAL OF PHARMACEUTICAL SCIENCES	1	0.004
INDIAN JOURNAL OF PHARMACOLOGY	1	0.004
INDIAN JOURNAL OF TRADITIONAL KNOWLEDGE	1	0.004
INDIAN PEDIATRICS	1	0.004
INFECTION	1	0.004
INFECTION AND IMMUNITY	1	0.004
INFECTIOUS DISEASE CLINICS OF NORTH AMERICA	1	0.004
INFECTIOUS DISEASES	1	0.004
INFLAMMATION	1	0.004
INFLAMMATORY BOWEL DISEASES	1	0.004
INNATE IMMUNITY	1	0.004
INNOVATIVE FOOD SCIENCE EMERGING TECHNOLOGIES	1	0.004
INORGANIC CHEMISTRY FRONTIERS	1	0.004
INTEGRATIVE BIOLOGY	1	0.004
INTERFACE FOCUS	1	0.004
INTERNATIONAL ARCHIVES OF ALLERGY AND IMMUNOLOGY	1	0.004
INTERNATIONAL JOURNAL OF BIO INSPIRED COMPUTATION	1	0.004
INTERNATIONAL JOURNAL OF CARDIOLOGY	1	0.004
INTERNATIONAL JOURNAL OF CARDIOVASCULAR IMAGING	1	0.004
INTERNATIONAL JOURNAL OF CLINICAL PHARMACY	1	0.004
INTERNATIONAL JOURNAL OF DATA MINING AND BIOINFORMATICS	1	0.004
INTERNATIONAL JOURNAL OF DIABETES IN DEVELOPING COUNTRIES	1	0.004
INTERNATIONAL JOURNAL OF ENDOCRINOLOGY	1	0.004
INTERNATIONAL JOURNAL OF FOOD SCIENCES AND NUTRITION	1	0.004
INTERNATIONAL JOURNAL OF GENOMICS	1	0.004
INTERNATIONAL JOURNAL OF HYGIENE AND ENVIRONMENTAL HEALTH	1	0.004
INTERNATIONAL JOURNAL OF IMAGING SYSTEMS AND TECHNOLOGY	1	0.004
INTERNATIONAL JOURNAL OF IMMUNOGENETICS	1	0.004
INTERNATIONAL JOURNAL OF INNOVATIVE COMPUTING INFORMATION AND CONTROL	1	0.004
INTERNATIONAL JOURNAL OF LABORATORY HEMATOLOGY	1	0.004
INTERNATIONAL JOURNAL OF MASS SPECTROMETRY	1	0.004
INTERNATIONAL JOURNAL OF MEDICAL ROBOTICS AND COMPUTER ASSISTED SURGERY	1	0.004
INTERNATIONAL JOURNAL OF NURSING PRACTICE	1	0.004
INTERNATIONAL JOURNAL OF ORAL AND MAXILLOFACIAL SURGERY	1	0.004
INTERNATIONAL JOURNAL OF PHARMACOLOGY	1	0.004
INTERNATIONAL JOURNAL OF PHOTOENERGY	1	0.004
INTERNATIONAL JOURNAL OF PSYCHIATRY IN MEDICINE	1	0.004
INTERNATIONAL JOURNAL OF THE PHYSICAL SCIENCES	1	0.004
INTERNATIONAL JOURNAL OF THERMOPHYSICS	1	0.004
INVESTIGATIVE OPHTHALMOLOGY VISUAL SCIENCE	1	0.004
IRANIAN JOURNAL OF PUBLIC HEALTH	1	0.004
JAAPA JOURNAL OF THE AMERICAN ACADEMY OF PHYSICIAN ASSISTANTS	1	0.004
JALA	1	0.004
JAPANESE JOURNAL OF APPLIED PHYSICS	1	0.004
JOURNAL OF ADOLESCENT AND YOUNG ADULT ONCOLOGY	1	0.004
JOURNAL OF ADVANCED RESEARCH	1	0.004
JOURNAL OF ANALYTICAL ATOMIC SPECTROMETRY	1	0.004
JOURNAL OF ANESTHESIA	1	0.004
JOURNAL OF APPLIED MATHEMATICS	1	0.004
JOURNAL OF APPLIED PHYSICS	1	0.004
JOURNAL OF APPLIED SPECTROSCOPY	1	0.004
JOURNAL OF BIOCHEMISTRY	1	0.004
JOURNAL OF BIOLOGICAL INORGANIC CHEMISTRY	1	0.004
JOURNAL OF BIOLOGICAL RESEARCH THESSALONIKI	1	0.004
JOURNAL OF BIOMEDICAL INFORMATICS	1	0.004
JOURNAL OF BIOMEDICAL OPTICS	1	0.004
JOURNAL OF BIOMOLECULAR SCREENING	1	0.004
JOURNAL OF BONE AND JOINT SURGERY BRITISH VOLUME	1	0.004
JOURNAL OF BREATH RESEARCH	1	0.004
JOURNAL OF CACHEXIA SARCOPENIA AND MUSCLE	1	0.004
JOURNAL OF CANCER EDUCATION	1	0.004
JOURNAL OF CARDIAC SURGERY	1	0.004
JOURNAL OF CARDIOTHORACIC AND VASCULAR ANESTHESIA	1	0.004
JOURNAL OF CARDIOTHORACIC SURGERY	1	0.004
JOURNAL OF CELL BIOLOGY	1	0.004
JOURNAL OF CHEMICAL PHYSICS	1	0.004
JOURNAL OF CHEMISTRY	1	0.004
JOURNAL OF CLINICAL ANESTHESIA	1	0.004
JOURNAL OF CLINICAL ENDOCRINOLOGY METABOLISM	1	0.004
JOURNAL OF CLINICAL LIPIDOLOGY	1	0.004
JOURNAL OF CLINICAL MICROBIOLOGY	1	0.004
JOURNAL OF CLINICAL PERIODONTOLOGY	1	0.004
JOURNAL OF CLINICAL PHARMACOLOGY	1	0.004
JOURNAL OF CLINICAL PSYCHIATRY	1	0.004
JOURNAL OF COMPARATIVE EFFECTIVENESS RESEARCH	1	0.004
JOURNAL OF COMPARATIVE PHYSIOLOGY B BIOCHEMICAL SYSTEMIC AND ENVIRONMENTAL PHYSIOLOGY	1	0.004
JOURNAL OF COMPUTATIONAL BIOLOGY	1	0.004
JOURNAL OF CRANIO MAXILLOFACIAL SURGERY	1	0.004
JOURNAL OF CRANIOFACIAL SURGERY	1	0.004
JOURNAL OF CUTANEOUS PATHOLOGY	1	0.004
JOURNAL OF CYSTIC FIBROSIS	1	0.004
JOURNAL OF DIABETES	1	0.004
JOURNAL OF DIGITAL IMAGING	1	0.004
JOURNAL OF EMERGENCY MEDICINE	1	0.004
JOURNAL OF ENDOCRINOLOGICAL INVESTIGATION	1	0.004
JOURNAL OF ENDODONTICS	1	0.004
JOURNAL OF EPIDEMIOLOGY AND COMMUNITY HEALTH	1	0.004
JOURNAL OF EXOTIC PET MEDICINE	1	0.004
JOURNAL OF FISH DISEASES	1	0.004
JOURNAL OF FLUORESCENCE	1	0.004
JOURNAL OF FOOD AGRICULTURE ENVIRONMENT	1	0.004
JOURNAL OF FOOD AND DRUG ANALYSIS	1	0.004
JOURNAL OF FOOD COMPOSITION AND ANALYSIS	1	0.004
JOURNAL OF GENERAL INTERNAL MEDICINE	1	0.004
JOURNAL OF GENETICS AND GENOMICS	1	0.004
JOURNAL OF GERIATRIC ONCOLOGY	1	0.004
JOURNAL OF GINSENG RESEARCH	1	0.004
JOURNAL OF HARD TISSUE BIOLOGY	1	0.004
JOURNAL OF HERBAL MEDICINE	1	0.004
JOURNAL OF IMMUNOLOGICAL METHODS	1	0.004
JOURNAL OF IMMUNOTOXICOLOGY	1	0.004
JOURNAL OF INHERITED METABOLIC DISEASE	1	0.004
JOURNAL OF INTERNAL MEDICINE	1	0.004
JOURNAL OF INVASIVE CARDIOLOGY	1	0.004
JOURNAL OF LABELLED COMPOUNDS RADIOPHARMACEUTICALS	1	0.004
JOURNAL OF MACROMOLECULAR SCIENCE PART A PURE AND APPLIED CHEMISTRY	1	0.004
JOURNAL OF MATERIALS RESEARCH	1	0.004
JOURNAL OF MEDICAL AND BIOLOGICAL ENGINEERING	1	0.004
JOURNAL OF MEDICAL DEVICES TRANSACTIONS OF THE ASME	1	0.004
JOURNAL OF MEDICAL ECONOMICS	1	0.004
JOURNAL OF MEDICAL PRIMATOLOGY	1	0.004
JOURNAL OF MICROBIOLOGY	1	0.004
JOURNAL OF MICROBIOLOGY IMMUNOLOGY AND INFECTION	1	0.004
JOURNAL OF MICROENCAPSULATION	1	0.004
JOURNAL OF MOLECULAR BIOLOGY	1	0.004
JOURNAL OF NEUROIMAGING	1	0.004
JOURNAL OF NEUROSCIENCE RESEARCH	1	0.004
JOURNAL OF NEUROSURGERY	1	0.004
JOURNAL OF NUCLEAR CARDIOLOGY	1	0.004
JOURNAL OF OCCUPATIONAL AND ENVIRONMENTAL MEDICINE	1	0.004
JOURNAL OF OCULAR PHARMACOLOGY AND THERAPEUTICS	1	0.004
JOURNAL OF OLEO SCIENCE	1	0.004
JOURNAL OF ONCOLOGY PHARMACY PRACTICE	1	0.004
JOURNAL OF PAEDIATRICS AND CHILD HEALTH	1	0.004
JOURNAL OF PAIN	1	0.004
JOURNAL OF PHARMACOLOGICAL AND TOXICOLOGICAL METHODS	1	0.004
JOURNAL OF PHARMACY AND PHARMACEUTICAL SCIENCES	1	0.004
JOURNAL OF PHYSICAL CHEMISTRY B	1	0.004
JOURNAL OF PHYSIOLOGICAL SCIENCES	1	0.004
JOURNAL OF SOLID STATE ELECTROCHEMISTRY	1	0.004
JOURNAL OF STROKE CEREBROVASCULAR DISEASES	1	0.004
JOURNAL OF STUDIES ON ALCOHOL AND DRUGS	1	0.004
JOURNAL OF SYNCHROTRON RADIATION	1	0.004
JOURNAL OF THE AMERICAN ANIMAL HOSPITAL ASSOCIATION	1	0.004
JOURNAL OF THE AMERICAN CHEMICAL SOCIETY	1	0.004
JOURNAL OF THE AMERICAN COLLEGE OF NUTRITION	1	0.004
JOURNAL OF THE AMERICAN COLLEGE OF RADIOLOGY	1	0.004
JOURNAL OF THE AMERICAN DENTAL ASSOCIATION	1	0.004
JOURNAL OF THE AMERICAN GERIATRICS SOCIETY	1	0.004
JOURNAL OF THE CHINESE CHEMICAL SOCIETY	1	0.004
JOURNAL OF THE NEUROLOGICAL SCIENCES	1	0.004
JOURNAL OF THE RENIN ANGIOTENSIN ALDOSTERONE SYSTEM	1	0.004
JOURNAL OF THE ROYAL SOCIETY INTERFACE	1	0.004
JOURNAL OF THEORETICAL BIOLOGY	1	0.004
JOURNAL OF THERMAL BIOLOGY	1	0.004
JOURNAL OF THORACIC ONCOLOGY	1	0.004
JOURNAL OF THROMBOSIS AND THROMBOLYSIS	1	0.004
JOURNAL OF VETERINARY DIAGNOSTIC INVESTIGATION	1	0.004
JOURNAL OF VETERINARY SCIENCE	1	0.004
JOURNAL OF X RAY SCIENCE AND TECHNOLOGY	1	0.004
JUNDISHAPUR JOURNAL OF MICROBIOLOGY	1	0.004
KOREAN CIRCULATION JOURNAL	1	0.004
KUWAIT MEDICAL JOURNAL	1	0.004
LABMEDICINE	1	0.004
LARYNGOSCOPE	1	0.004
LASER PHYSICS	1	0.004
LASERS IN SURGERY AND MEDICINE	1	0.004
LETTERS IN APPLIED MICROBIOLOGY	1	0.004
LIBYAN JOURNAL OF MEDICINE	1	0.004
LUNG CANCER	1	0.004
MAGNETIC RESONANCE IN MEDICINE	1	0.004
MAGNETIC RESONANCE MATERIALS IN PHYSICS BIOLOGY AND MEDICINE	1	0.004
MALAYSIAN JOURNAL OF PATHOLOGY	1	0.004
MASS SPECTROMETRY REVIEWS	1	0.004
MATHEMATICAL BIOSCIENCES AND ENGINEERING	1	0.004
MATRIX BIOLOGY	1	0.004
MECHANISMS OF AGEING AND DEVELOPMENT	1	0.004
MEDCHEMCOMM	1	0.004
MEDICAL CARE	1	0.004
MEDICAL JOURNAL OF AUSTRALIA	1	0.004
MEDICAL PHYSICS	1	0.004
METABOLIC ENGINEERING	1	0.004
METABOLISM CLINICAL AND EXPERIMENTAL	1	0.004
METHODS	1	0.004
METHODS AND FINDINGS IN EXPERIMENTAL AND CLINICAL PHARMACOLOGY	1	0.004
METHODS OF INFORMATION IN MEDICINE	1	0.004
MICROBIAL PATHOGENESIS	1	0.004
MICROBIOLOGY AND IMMUNOLOGY	1	0.004
MICROCHIMICA ACTA	1	0.004
MICROSCOPY RESEARCH AND TECHNIQUE	1	0.004
MILITARY MEDICINE	1	0.004
MITOCHONDRIAL DNA PART A	1	0.004
MOLECULAR AND CELLULAR PROBES	1	0.004
MOLECULAR CYTOGENETICS	1	0.004
MOLECULAR MEMBRANE BIOLOGY	1	0.004
MOLECULAR VISION	1	0.004
MOUNT SINAI JOURNAL OF MEDICINE	1	0.004
MYCOTOXIN RESEARCH	1	0.004
NAGOYA JOURNAL OF MEDICAL SCIENCE	1	0.004
NANO	1	0.004
NANO LETTERS	1	0.004
NATIONAL MEDICAL JOURNAL OF INDIA	1	0.004
NATIONAL SCIENCE REVIEW	1	0.004
NATURE BIOTECHNOLOGY	1	0.004
NATURE CLINICAL PRACTICE GASTROENTEROLOGY HEPATOLOGY	1	0.004
NATURE IMMUNOLOGY	1	0.004
NATURE MATERIALS	1	0.004
NATURE PROTOCOLS	1	0.004
NATURE REVIEWS CANCER	1	0.004
NATURE REVIEWS DISEASE PRIMERS	1	0.004
NEUROLOGIA MEDICO CHIRURGICA	1	0.004
NEUROPSYCHIATRIC DISEASE AND TREATMENT	1	0.004
NEUROSURGERY	1	0.004
NEUROSURGERY QUARTERLY	1	0.004
NEW ZEALAND VETERINARY JOURNAL	1	0.004
NOBEL MEDICUS	1	0.004
NUCLEAR SCIENCE AND TECHNIQUES	1	0.004
NUCLEOSIDES NUCLEOTIDES NUCLEIC ACIDS	1	0.004
NUTRICION HOSPITALARIA	1	0.004
NUTRITION	1	0.004
NUTRITION AND PHYSICAL ACTIVITY IN AGING OBESITY AND CANCER	1	0.004
NUTRITION DIABETES	1	0.004
NUTRITION RESEARCH AND PRACTICE	1	0.004
OLIGONUCLEOTIDES	1	0.004
ONCOLOGIE	1	0.004
OPTIK	1	0.004
ORGANOGENESIS	1	0.004
ORTHOPEDICS	1	0.004
PAKISTAN JOURNAL OF ZOOLOGY	1	0.004
PANCREATOLOGY	1	0.004
PARASITES VECTORS	1	0.004
PARASITOLOGY INTERNATIONAL	1	0.004
PARTICLE AND FIBRE TOXICOLOGY	1	0.004
PATIENT PREFERENCE AND ADHERENCE	1	0.004
PEDIATRIC DERMATOLOGY	1	0.004
PEDIATRIC INFECTIOUS DISEASE JOURNAL	1	0.004
PEDIATRIC OBESITY	1	0.004
PEDIATRIC SURGERY INTERNATIONAL	1	0.004
PEDIATRICS	1	0.004
PEDIATRICS INTERNATIONAL	1	0.004
PERITONEAL DIALYSIS INTERNATIONAL	1	0.004
PESTICIDE BIOCHEMISTRY AND PHYSIOLOGY	1	0.004
PHARMACEUTICAL CHEMISTRY JOURNAL	1	0.004
PHARMACEUTICAL DEVELOPMENT AND TECHNOLOGY	1	0.004
PHARMACEUTICS	1	0.004
PHARMACOECONOMICS	1	0.004
PHARMACOGENETICS AND GENOMICS	1	0.004
PHARMACOGENOMICS	1	0.004
PHARMACOTHERAPY	1	0.004
PHOTOCHEMICAL PHOTOBIOLOGICAL SCIENCES	1	0.004
PHOTOMEDICINE AND LASER SURGERY	1	0.004
PHYSICA MEDICA EUROPEAN JOURNAL OF MEDICAL PHYSICS	1	0.004
PHYSICS OF PLASMAS	1	0.004
PHYSIOLOGICAL GENOMICS	1	0.004
PLANT CELL TISSUE AND ORGAN CULTURE	1	0.004
PLANT FOODS FOR HUMAN NUTRITION	1	0.004
PLASMA SCIENCE TECHNOLOGY	1	0.004
PLOS COMPUTATIONAL BIOLOGY	1	0.004
PLOS PATHOGENS	1	0.004
POLISH JOURNAL OF PATHOLOGY	1	0.004
POLYMER	1	0.004
POLYMERS	1	0.004
POSTGRADUATE MEDICINE	1	0.004
POULTRY SCIENCE	1	0.004
PRESSE MEDICALE	1	0.004
PREVENTIVE MEDICINE	1	0.004
PROCESSES	1	0.004
PROGRESS IN NATURAL SCIENCE	1	0.004
PROSTAGLANDINS LEUKOTRIENES AND ESSENTIAL FATTY ACIDS	1	0.004
PROTEIN JOURNAL	1	0.004
PRZEMYSL CHEMICZNY	1	0.004
PTERIDINES	1	0.004
PUBLIC HEALTH NUTRITION	1	0.004
PUBLIC HEALTH REPORTS	1	0.004
PURINERGIC SIGNALLING	1	0.004
QUANTITATIVE IMAGING IN MEDICINE AND SURGERY	1	0.004
RADIATION AND ENVIRONMENTAL BIOPHYSICS	1	0.004
REGIONAL ANESTHESIA AND PAIN MEDICINE	1	0.004
RENAL FAILURE	1	0.004
REPRODUCTION	1	0.004
RESPIRATION	1	0.004
REVISTA DA SOCIEDADE BRASILEIRA DE MEDICINA TROPICAL	1	0.004
REVISTA DE CHIMIE	1	0.004
REVISTA DO INSTITUTO DE MEDICINA TROPICAL DE SAO PAULO	1	0.004
REVISTA MEDICA DE CHILE	1	0.004
REVISTA ROMANA DE BIOETICA	1	0.004
REVISTA ROMANA DE MEDICINA DE LABORATOR	1	0.004
REVUE DE MEDECINE VETERINAIRE	1	0.004
RHEUMATOLOGY INTERNATIONAL	1	0.004
RNA A PUBLICATION OF THE RNA SOCIETY	1	0.004
RNA BIOLOGY	1	0.004
ROFO FORTSCHRITTE AUF DEM GEBIET DER RONTGENSTRAHLEN UND DER BILDGEBENDEN VERFAHREN	1	0.004
ROMANIAN BIOTECHNOLOGICAL LETTERS	1	0.004
RUSSIAN JOURNAL OF BIOORGANIC CHEMISTRY	1	0.004
RUSSIAN JOURNAL OF DEVELOPMENTAL BIOLOGY	1	0.004
SAMJ SOUTH AFRICAN MEDICAL JOURNAL	1	0.004
SAUDI PHARMACEUTICAL JOURNAL	1	0.004
SCIENCE	1	0.004
SCIENCE AND TECHNOLOGY OF ADVANCED MATERIALS	1	0.004
SCIENCE BULLETIN	1	0.004
SEIZURE EUROPEAN JOURNAL OF EPILEPSY	1	0.004
SENSORS	1	0.004
SENSORS AND ACTUATORS B CHEMICAL	1	0.004
SKELETAL RADIOLOGY	1	0.004
SMALL	1	0.004
SPECTROCHIMICA ACTA PART A MOLECULAR AND BIOMOLECULAR SPECTROSCOPY	1	0.004
SPECTROSCOPY LETTERS	1	0.004
STEM CELL REPORTS	1	0.004
STEM CELL REVIEWS AND REPORTS	1	0.004
SURGICAL INFECTIONS	1	0.004
SURGICAL INNOVATION	1	0.004
SURGICAL PRACTICE	1	0.004
TECHNOLOGY AND HEALTH CARE	1	0.004
THERAPEUTIC APHERESIS AND DIALYSIS	1	0.004
THERIOGENOLOGY	1	0.004
THESCIENTIFICWORLDJOURNAL	1	0.004
THYROID	1	0.004
TISSUE ENGINEERING PART C METHODS	1	0.004
TOXINS	1	0.004
TRANSGENIC RESEARCH	1	0.004
TROPICAL DOCTOR	1	0.004
TURKIYE KLINIKLERI TIP BILIMLERI DERGISI	1	0.004
UHOD ULUSLARARASI HEMATOLOJI ONKOLOJI DERGISI	1	0.004
ULTRASONICS SONOCHEMISTRY	1	0.004
ULUSAL TRAVMA VE ACIL CERRAHI DERGISI TURKISH JOURNAL OF TRAUMA EMERGENCY SURGERY	1	0.004
UROLOGIC ONCOLOGY SEMINARS AND ORIGINAL INVESTIGATIONS	1	0.004
VALUE IN HEALTH	1	0.004
VETERINARNI MEDICINA	1	0.004
VETERINARY AND COMPARATIVE ONCOLOGY	1	0.004
VETERINARY JOURNAL	1	0.004
VETERINARY RADIOLOGY ULTRASOUND	1	0.004
VETERINARY RECORD	1	0.004
VIRUS GENES	1	0.004
VITAMIN K	1	0.004
VITAMINS AND HORMONES	1	0.004
VOJNOSANITETSKI PREGLED	1	0.004
WIDEOCHIRURGIA I INNE TECHNIKI MALOINWAZYJNE	1	0.004
WORLD JOURNAL OF EMERGENCY SURGERY	1	0.004
WORLD JOURNAL OF STEM CELLS	1	0.004
WORLD MYCOTOXIN JOURNAL	1	0.004
WORLD NEUROSURGERY	1	0.004
YAKUGAKU ZASSHI JOURNAL OF THE PHARMACEUTICAL SOCIETY OF JAPAN	1	0.004
ZEITSCHRIFT FUR NATURFORSCHUNG SECTION C A JOURNAL OF BIOSCIENCES	1	0.004
(1671 Source Titles {0} {1} value(s) outside display options.)
(0 records (0.000%){0} records{1} do not contain data in the field being analyzed.)
