# Supplementary material for: Trends in hepatocellular carcinoma research from 2008 to 2017: a bibliometric analysis
Source: PeerJ. 2018 Aug 15;6:e5477. doi: 10.7717/peerj.5477 (PMC6098682; doi:10.7717/peerj.5477)
Supplement: Dataset S2 [file peerj-06-5477-s002.xlsx]

## Sheet: Sheet1
Countries/Regions	records	% of 24331
PEOPLES R CHINA	10755	44.203
USA	3993	16.411
JAPAN	3296	13.547
SOUTH KOREA	1937	7.961
TAIWAN	1540	6.329
ITALY	1335	5.487
GERMANY	926	3.806
FRANCE	729	2.996
ENGLAND	452	1.858
SPAIN	433	1.78
CANADA	387	1.591
EGYPT	381	1.566
SINGAPORE	314	1.291
INDIA	284	1.167
SWITZERLAND	229	0.941
AUSTRALIA	224	0.921
TURKEY	194	0.797
BRAZIL	149	0.612
NETHERLANDS	148	0.608
AUSTRIA	139	0.571
BELGIUM	135	0.555
GREECE	131	0.538
SAUDI ARABIA	111	0.456
THAILAND	110	0.452
SWEDEN	104	0.427
IRAN	82	0.337
DENMARK	72	0.296
ROMANIA	65	0.267
POLAND	64	0.263
PAKISTAN	57	0.234
ISRAEL	50	0.205
ARGENTINA	47	0.193
MALAYSIA	47	0.193
PORTUGAL	47	0.193
SOUTH AFRICA	46	0.189
RUSSIA	45	0.185
HUNGARY	37	0.152
MEXICO	36	0.148
NORWAY	36	0.148
SCOTLAND	33	0.136
NEW ZEALAND	31	0.127
CZECH REPUBLIC	28	0.115
FINLAND	28	0.115
SERBIA	19	0.078
CHILE	18	0.074
IRELAND	17	0.07
INDONESIA	16	0.066
NIGERIA	16	0.066
U ARAB EMIRATES	16	0.066
MOROCCO	15	0.062
PHILIPPINES	15	0.062
VIETNAM	15	0.062
SLOVENIA	13	0.053
MONGOL PEO REP	12	0.049
TUNISIA	11	0.045
CROATIA	9	0.037
LEBANON	9	0.037
GAMBIA	8	0.033
NORTH IRELAND	8	0.033
VENEZUELA	8	0.033
COLOMBIA	7	0.029
PERU	7	0.029
SLOVAKIA	7	0.029
GHANA	6	0.025
IRAQ	6	0.025
SRI LANKA	6	0.025
LITHUANIA	5	0.021
BULGARIA	4	0.016
MYANMAR	4	0.016
WALES	4	0.016
CAMEROON	3	0.012
ETHIOPIA	3	0.012
KUWAIT	3	0.012
LUXEMBOURG	3	0.012
MACEDONIA	3	0.012
NEPAL	3	0.012
QATAR	3	0.012
SUDAN	3	0.012
UGANDA	3	0.012
UKRAINE	3	0.012
ALGERIA	2	0.008
BANGLADESH	2	0.008
COTE IVOIRE	2	0.008
ESTONIA	2	0.008
GUADELOUPE	2	0.008
KAZAKHSTAN	2	0.008
LAOS	2	0.008
LIBYA	2	0.008
MALTA	2	0.008
SYRIA	2	0.008
URUGUAY	2	0.008
ARMENIA	1	0.004
BAHRAIN	1	0.004
BENIN	1	0.004
BRUNEI	1	0.004
BYELARUS	1	0.004
CAMBODIA	1	0.004
CAPE VERDE	1	0.004
CONGO	1	0.004
COSTA RICA	1	0.004
CUBA	1	0.004
CYPRUS	1	0.004
DOMINICA	1	0.004
FIJI	1	0.004
GREENLAND	1	0.004
JAMAICA	1	0.004
JORDAN	1	0.004
KENYA	1	0.004
LATVIA	1	0.004
MALAWI	1	0.004
MAURITIUS	1	0.004
SENEGAL	1	0.004
TANZANIA	1	0.004
TOGO	1	0.004
YEMEN	1	0.004
ZAMBIA	1	0.004
(106 Countries/Regions {0} {1} value(s) outside display options.)
(14 records (0.058%){0} records{1} do not contain data in the field being analyzed.)
