# Supplementary material for: Trends in hepatocellular carcinoma research from 2008 to 2017: a bibliometric analysis
Source: PeerJ. 2018 Aug 15;6:e5477. doi: 10.7717/peerj.5477 (PMC6098682; doi:10.7717/peerj.5477)
Supplement: Dataset S4 [file peerj-06-5477-s004.xlsx]

## Sheet: Sheet1
Authors	records	% of 24331
WANG Y	297	1.221
LI J	291	1.196
ZHANG Y	279	1.147
ZHANG J	264	1.085
ZHANG L	254	1.044
LI Y	240	0.986
FAN J	237	0.974
WANG J	235	0.966
LIU Y	226	0.929
ZHOU J	225	0.925
WANG L	222	0.912
CHEN J	211	0.867
KUDO M	208	0.855
YANG Y	199	0.818
LEE JH	187	0.769
ZHOU L	185	0.76
LIU J	184	0.756
LI B	166	0.682
KIM JH	164	0.674
WANG H	162	0.666
WU MC	162	0.666
CHEN Y	161	0.662
ZHANG W	160	0.658
LI H	159	0.653
HAN KH	149	0.612
ZHENG SS	148	0.608
CHEN L	145	0.596
LI L	144	0.592
WANG Q	139	0.571
ZHANG H	139	0.571
WU J	135	0.555
KIM YJ	131	0.538
KOKUDO N	130	0.534
LIU C	129	0.53
LIU L	129	0.53
WANG HY	129	0.53
LI X	128	0.526
LI Q	126	0.518
ZHANG X	126	0.518
KIM SH	124	0.51
HUANG YH	123	0.506
TANG ZY	120	0.493
MAEHARA Y	117	0.481
LI N	115	0.473
YOON JH	115	0.473
LI JJ	114	0.469
POON RTP	114	0.469
YANG J	112	0.46
ZHANG Q	112	0.46
KIM DY	110	0.452
WANG F	108	0.444
WANG JH	108	0.444
WANG W	108	0.444
XIE HY	107	0.44
SHIRABE K	106	0.436
ZHAO J	105	0.432
WANG X	103	0.423
WANG Z	101	0.415
LAU WY	99	0.407
LI W	99	0.407
LIU H	99	0.407
XU Y	99	0.407
FAN ST	97	0.399
QIU SJ	97	0.399
ZHAO Y	97	0.399
LI LQ	96	0.395
WANG C	96	0.395
XU L	96	0.395
KIM YS	95	0.39
LI C	95	0.39
YAN LN	95	0.39
ZHANG T	95	0.39
ZHANG YJ	95	0.39
CHENG AL	94	0.386
PARK JY	94	0.386
YU L	93	0.382
AHN SH	92	0.378
WANG K	91	0.374
YANG JY	91	0.374
ZHANG C	91	0.374
LIU M	90	0.37
CHEN H	89	0.366
KANEKO S	89	0.366
LI M	89	0.366
WANG XY	89	0.366
HUANG Y	88	0.362
ZHOU WP	88	0.362
LEE HS	87	0.358
TANAKA S	87	0.358
WANG B	87	0.358
CHEN X	86	0.353
LO CM	86	0.353
ZHOU Y	86	0.353
SHEN F	85	0.349
LIU B	84	0.345
KIM HS	83	0.341
LEE JM	83	0.341
LIN CC	83	0.341
YANG L	83	0.341
YUAN YF	83	0.341
CHEN G	82	0.337
CHEN MS	81	0.333
LEE HC	81	0.333
YAO M	81	0.333
ZHANG B	81	0.333
ZHANG M	80	0.329
LI S	79	0.325
LIU F	79	0.325
LU SN	79	0.325
SUN HC	79	0.325
TAKETOMI A	79	0.325
ZHANG S	79	0.325
XU J	78	0.321
LEE WJ	77	0.316
YU J	77	0.316
LIN HC	76	0.312
LI T	75	0.308
CHEN TY	74	0.304
PAIK SW	73	0.3
CHEN CL	72	0.296
LAI PBS	72	0.296
PARK JH	72	0.296
YOKOSUKA O	72	0.296
YU SJ	72	0.296
CHAYAMA K	71	0.292
HASEGAWA K	71	0.292
KIM H	71	0.292
KIM KM	71	0.292
KIM SU	71	0.292
LIU X	71	0.292
RHIM H	71	0.292
WEN TF	71	0.292
WU H	71	0.292
YOSHIDA H	71	0.292
CHEN W	70	0.288
TANAKA K	70	0.288
WEI W	70	0.288
HUO TI	69	0.284
KIM JW	69	0.284
KUMADA T	69	0.284
LEE DH	69	0.284
LEE YJ	69	0.284
SEONG J	69	0.284
WANG D	69	0.284
ZHANG XF	69	0.284
CHEN PJ	68	0.279
CHEN Z	68	0.279
GAO Y	68	0.279
LIM HK	68	0.279
LLOVET JM	68	0.279
CHEN YJ	67	0.275
CHOI JY	67	0.275
LI Z	67	0.275
NG IOL	67	0.275
PARK JW	67	0.275
QIN LX	67	0.275
WANG T	67	0.275
YAMASHITA T	67	0.275
CHEN YL	66	0.271
KIM MJ	66	0.271
LI F	66	0.271
PARK YN	66	0.271
YANG H	66	0.271
ARII S	65	0.267
BOLONDI L	65	0.267
CHEUNG TT	65	0.267
LIU YH	65	0.267
ZHANG YQ	65	0.267
CHEN CH	64	0.263
CHEN XP	64	0.263
CHOI D	64	0.263
LIU YK	64	0.263
OSAKI Y	64	0.263
SHI J	64	0.263
SUZUKI Y	64	0.263
TOYODA H	64	0.263
YOSHIZUMI T	64	0.263
ZHANG JY	64	0.263
CHUNG JW	63	0.259
IZUMI N	63	0.259
LIU W	63	0.259
PARK CK	63	0.259
REN ZG	63	0.259
CUCCHETTI A	62	0.255
HSU CY	62	0.255
HUANG J	62	0.255
KOBAYASHI S	62	0.255
LEE JS	62	0.255
MATSUI O	62	0.255
PINNA AD	62	0.255
SU CW	62	0.255
ZHU AX	62	0.255
CAO Y	61	0.251
IKEGAMI T	61	0.251
KIM SJ	61	0.251
KOIKE K	61	0.251
LEE SH	61	0.251
YAMADA S	61	0.251
YU Y	61	0.251
ZHAO H	61	0.251
AIKATA H	60	0.247
IKEDA K	60	0.247
JOH JW	60	0.247
KIM KS	60	0.247
KOBAYASHI T	60	0.247
KUMADA H	60	0.247
LIM YS	60	0.247
MORI M	60	0.247
SHI M	60	0.247
TATEISHI R	60	0.247
DONG JH	59	0.242
HUANG C	59	0.242
KIM HC	59	0.242
LEE YH	59	0.242
LU J	59	0.242
NISHIDA N	59	0.242
SHIM JH	59	0.242
TAKAYAMA T	59	0.242
WANG LY	59	0.242
WANG P	59	0.242
YAMAMOTO K	59	0.242
YANG SF	59	0.242
YANG X	59	0.242
BAE SH	58	0.238
BRUIX J	58	0.238
GAO J	58	0.238
KIMURA T	58	0.238
LEE KH	58	0.238
ROBERTS LR	58	0.238
ZHANG XY	58	0.238
FARINATI F	57	0.234
MA L	57	0.234
NAGANO H	57	0.234
PAWLIK TM	57	0.234
SUN J	57	0.234
WANG S	57	0.234
WU Y	57	0.234
ZHANG BH	57	0.234
CHEN K	56	0.23
CHEN YC	56	0.23
HU TH	56	0.23
LIU Q	56	0.23
OMATA M	56	0.23
SAKAMOTO M	56	0.23
SHI YH	56	0.23
TANAKA H	56	0.23
TREVISANI F	56	0.23
WANG WT	56	0.23
WANG YF	56	0.23
XU X	56	0.23
CHEN CJ	55	0.226
CHOI JS	55	0.226
KIM KH	55	0.226
LIU XY	55	0.226
SUN L	55	0.226
TAKAHASHI S	55	0.226
WANG XM	55	0.226
WANG YH	55	0.226
ZHAO L	55	0.226
ZHU J	55	0.226
GWAK GY	54	0.222
LEE MW	54	0.222
LEE SG	54	0.222
LI ZY	54	0.222
LU Y	54	0.222
ZHANG N	54	0.222
ZHOU X	54	0.222
HE J	53	0.218
KIM JS	53	0.218
KOBAYASHI M	53	0.218
MA J	53	0.218
QIN X	53	0.218
SALEM R	53	0.218
SINGAL AG	53	0.218
SUH KS	53	0.218
WEI LX	53	0.218
YAMASHITA Y	53	0.218
ZHONG JH	53	0.218
CHUNG YH	52	0.214
LEE SD	52	0.214
LIN Y	52	0.214
PISCAGLIA F	52	0.214
UEMOTO S	52	0.214
WU JC	52	0.214
WU WZ	52	0.214
YANG Z	52	0.214
YEH CT	52	0.214
YOON SK	52	0.214
BEPPU T	51	0.21
HSIA CY	51	0.21
KIM HJ	51	0.21
LEE J	51	0.21
LIU S	51	0.21
MA Y	51	0.21
MAZZAFERRO V	51	0.21
MINAMI Y	51	0.21
SHIINA S	51	0.21
WANG XW	51	0.21
WANG YL	51	0.21
WEI L	51	0.21
WU Q	51	0.21
CHAN SC	50	0.205
CHOK KSH	50	0.205
DAI Z	50	0.205
FUJII T	50	0.205
LI HY	50	0.205
LI R	50	0.205
NOUSO K	50	0.205
WATANABE M	50	0.205
YANG JM	50	0.205
YE SL	50	0.205
ZHU Y	50	0.205
KIM J	49	0.201
LI D	49	0.201
LI YH	49	0.201
NISHIKAWA H	49	0.201
TANG H	49	0.201
VILLANUEVA A	49	0.201
WANG R	49	0.201
YE QH	49	0.201
ZHANG R	49	0.201
CHEN KF	48	0.197
EGUCHI H	48	0.197
HONDA M	48	0.197
JIANG Y	48	0.197
KIM JM	48	0.197
KOH KC	48	0.197
LEE WC	48	0.197
LIANG J	48	0.197
SUN Y	48	0.197
WANG CC	48	0.197
WANG G	48	0.197
WANG M	48	0.197
WANG N	48	0.197
WANG XL	48	0.197
XIANG BD	48	0.197
CAO J	47	0.193
CARR BI	47	0.193
CESCON M	47	0.193
CHAN SL	47	0.193
CHEN SC	47	0.193
CHENG SQ	47	0.193
CHIBA T	47	0.193
CILLO U	47	0.193
COLOMBO M	47	0.193
GAO Q	47	0.193
HATANO E	47	0.193
KIM JK	47	0.193
KIM KW	47	0.193
LEE YS	47	0.193
LIU K	47	0.193
SUGIMOTO H	47	0.193
TANAKA Y	47	0.193
UESHIMA K	47	0.193
XIE D	47	0.193
XU M	47	0.193
ZHANG YF	47	0.193
CHIOU YY	46	0.189
CHOI MS	46	0.189
HAYASHI H	46	0.189
LIU CJ	46	0.189
LIU QG	46	0.189
LV Y	46	0.189
WADA H	46	0.189
WANG HJ	46	0.189
ZHANG F	46	0.189
ZHANG HY	46	0.189
ZHANG JB	46	0.189
ZHANG YH	46	0.189
ZHAO X	46	0.189
ZHU XD	46	0.189
BABA H	45	0.185
HIASA Y	45	0.185
HU Y	45	0.185
KAWAMURA Y	45	0.185
LEE S	45	0.185
LI P	45	0.185
LI XY	45	0.185
LIU JF	45	0.185
LIU YF	45	0.185
MAKUUCHI M	45	0.185
WANG XH	45	0.185
WANG YJ	45	0.185
YANG F	45	0.185
YANG W	45	0.185
YANG XR	45	0.185
ZHANG XD	45	0.185
ZHANG YY	45	0.185
CHEN D	44	0.181
CHEN LL	44	0.181
HE Y	44	0.181
HSU CH	44	0.181
HU B	44	0.181
IMAI Y	44	0.181
KIM YK	44	0.181
LEE SJ	44	0.181
LI K	44	0.181
LIN CY	44	0.181
LIU FY	44	0.181
ZHENG L	44	0.181
ZHENG X	44	0.181
DOU KF	43	0.177
HAN JK	43	0.177
JIANG L	43	0.177
KANDA M	43	0.177
KIM HY	43	0.177
LI XL	43	0.177
LIU JJ	43	0.177
LU X	43	0.177
NOMOTO S	43	0.177
PARK MS	43	0.177
PARK SY	43	0.177
SHEN J	43	0.177
SUGIMOTO K	43	0.177
SUN BC	43	0.177
TADA T	43	0.177
WANG CJ	43	0.177
WANG XB	43	0.177
WU W	43	0.177
YEO W	43	0.177
CHEN HY	42	0.173
CHEN P	42	0.173
CHEN Q	42	0.173
CHOI GH	42	0.173
DOKI Y	42	0.173
GUAN XY	42	0.173
HUANG H	42	0.173
HUANG JF	42	0.173
KIM BK	42	0.173
KIM DG	42	0.173
KITA R	42	0.173
LEE D	42	0.173
LEE JY	42	0.173
LIANG P	42	0.173
LIU T	42	0.173
OKUSAKA T	42	0.173
SAKAMOTO Y	42	0.173
WANG CH	42	0.173
WANG ZX	42	0.173
YOO BC	42	0.173
YU MC	42	0.173
CABIBBO G	41	0.169
CHAN ACY	41	0.169
GUO RP	41	0.169
HAGIWARA S	41	0.169
HSU C	41	0.169
HUANG CY	41	0.169
HUANG L	41	0.169
HWANG S	41	0.169
ICHIKAWA T	41	0.169
IKEDA M	41	0.169
JANG JW	41	0.169
JIA WD	41	0.169
KONDO Y	41	0.169
LEWANDOWSKI RJ	41	0.169
LI YY	41	0.169
LIN SM	41	0.169
LIU Z	41	0.169
NAKAMURA S	41	0.169
SANGRO B	41	0.169
SHIMADA M	41	0.169
SUGAWARA Y	41	0.169
XIA Q	41	0.169
XIA Y	41	0.169
XIE XY	41	0.169
XU GL	41	0.169
YANG M	41	0.169
YANG T	41	0.169
ZENG ZC	41	0.169
CHEN CY	40	0.164
CHEN ZN	40	0.164
CHO JY	40	0.164
GAO DM	40	0.164
GOTO T	40	0.164
LIU HY	40	0.164
LIU XL	40	0.164
MURAKAMI T	40	0.164
OGASAWARA S	40	0.164
SHEN XZ	40	0.164
TANAKA T	40	0.164
TANG W	40	0.164
XU MQ	40	0.164
YU X	40	0.164
ZHANG D	40	0.164
ZHANG ZY	40	0.164
ZHAO JJ	40	0.164
CHEN C	39	0.16
GALLE PR	39	0.16
GUO Y	39	0.16
HARIMOTO N	39	0.16
HAYASHI N	39	0.16
HUNG CH	39	0.16
INOUE T	39	0.16
KIM S	39	0.16
LEE CM	39	0.16
LEE HJ	39	0.16
LEE JW	39	0.16
LEE MH	39	0.16
LENCIONI R	39	0.16
LI SP	39	0.16
LIU JB	39	0.16
LIU XH	39	0.16
LUO Y	39	0.16
MARRERO JA	39	0.16
POON RT	39	0.16
SHI Y	39	0.16
WANG LM	39	0.16
WANG XJ	39	0.16
WANG YC	39	0.16
WU D	39	0.16
ARIZUMI T	38	0.156
CATURELLI E	38	0.156
CHOI BI	38	0.156
CHOW PKH	38	0.156
GIANNINI EG	38	0.156
GUO H	38	0.156
HIROOKA M	38	0.156
JIN Y	38	0.156
KIM MS	38	0.156
KUBO S	38	0.156
LIU R	38	0.156
LUK JM	38	0.156
MCGLYNN KA	38	0.156
OKABE H	38	0.156
SOEJIMA Y	38	0.156
VITALE A	38	0.156
YANG B	38	0.156
ZHANG Z	38	0.156
ZHAO FY	38	0.156
ZHAO Q	38	0.156
CHAN HLY	37	0.152
CHEN XM	37	0.152
HAN S	37	0.152
HOSAKA T	37	0.152
HOSHIDA Y	37	0.152
HUANG XW	37	0.152
JIANG H	37	0.152
KAWAOKA T	37	0.152
KODERA Y	37	0.152
LEE SW	37	0.152
LIN ZY	37	0.152
LIU ZY	37	0.152
MARUBASHI S	37	0.152
PECK-RADOSAVLJEVIC M	37	0.152
SUZUKI F	37	0.152
WANG YY	37	0.152
WANG ZM	37	0.152
WU CC	37	0.152
XU HX	37	0.152
YAN J	37	0.152
YU H	37	0.152
ZHANG P	37	0.152
ZHANG SH	37	0.152
ZHANG XL	37	0.152
ZHENG LM	37	0.152
ZHU JY	37	0.152
CHEN F	36	0.148
CHEN RX	36	0.148
CHON CY	36	0.148
DING J	36	0.148
DONG QZ	36	0.148
ERCOLANI G	36	0.148
HONDA H	36	0.148
JIANG JH	36	0.148
JIANG W	36	0.148
KANAI F	36	0.148
KIM CY	36	0.148
LI G	36	0.148
LIM HY	36	0.148
LIU ZK	36	0.148
MAN K	36	0.148
PAIK YH	36	0.148
RAOUL JL	36	0.148
SAKAMOTO A	36	0.148
SAKURAI T	36	0.148
SATA M	36	0.148
SHI L	36	0.148
TAKEHARA T	36	0.148
TANG JW	36	0.148
WANG WL	36	0.148
YANG YF	36	0.148
YOSHIDA M	36	0.148
ZENG Y	36	0.148
ZHANG HX	36	0.148
ZHANG YX	36	0.148
ZHOU B	36	0.148
ABE M	35	0.144
AISHIMA S	35	0.144
AKUTA N	35	0.144
ARASE Y	35	0.144
CHENG J	35	0.144
EL-SERAG HB	35	0.144
GAO CF	35	0.144
GAO S	35	0.144
GE C	35	0.144
HASHIMOTO M	35	0.144
HUI KM	35	0.144
ISHIKAWA T	35	0.144
JAE HJ	35	0.144
JIA HL	35	0.144
KUBOTA K	35	0.144
LAURENT A	35	0.144
LI XH	35	0.144
LI YQ	35	0.144
LIU YY	35	0.144
LU CH	35	0.144
MA JL	35	0.144
OHDAN H	35	0.144
PARK SJ	35	0.144
SEZAKI H	35	0.144
SHI GM	35	0.144
SUN W	35	0.144
TANAKA M	35	0.144
TRINCHET JC	35	0.144
TU KS	35	0.144
WANG GY	35	0.144
WANG JL	35	0.144
WU F	35	0.144
XING JL	35	0.144
ZHANG CY	35	0.144
ZHANG HW	35	0.144
ZHANG JJ	35	0.144
ZHANG JP	35	0.144
ZHENG Y	35	0.144
ZHOU Q	35	0.144
ZHU H	35	0.144
ZUCMAN-ROSSI J	35	0.144
BIE P	34	0.14
DING ZB	34	0.14
DU J	34	0.14
HE S	34	0.14
HUANG JW	34	0.14
HUANG W	34	0.14
HUANG XY	34	0.14
IMAI K	34	0.14
KIM SY	34	0.14
KONDO M	34	0.14
LAI ECH	34	0.14
LI MY	34	0.14
LIN CL	34	0.14
LIU CY	34	0.14
MOON DB	34	0.14
PARK HC	34	0.14
SAITO T	34	0.14
SATO M	34	0.14
SHAO YY	34	0.14
SUZUKI E	34	0.14
TANG J	34	0.14
THORGEIRSSON SS	34	0.14
YAMAMOTO M	34	0.14
YANG HI	34	0.14
ZHANG SJ	34	0.14
BORZIO F	33	0.136
CHEN M	33	0.136
CHEN R	33	0.136
CHEN YY	33	0.136
CHENG YF	33	0.136
CHOI YH	33	0.136
CHUANG WL	33	0.136
CONG WM	33	0.136
GAO F	33	0.136
GU JR	33	0.136
GUO X	33	0.136
GUO Z	33	0.136
HIRAMATSU A	33	0.136
INAGAKI Y	33	0.136
ITOH S	33	0.136
KIM TH	33	0.136
KIM YH	33	0.136
LEE CH	33	0.136
LEE KW	33	0.136
LI YM	33	0.136
LIAO WJ	33	0.136
MIYAMOTO Y	33	0.136
MULCAHY MF	33	0.136
NAKAMURA Y	33	0.136
NUMATA K	33	0.136
OKAMOTO K	33	0.136
ONISHI H	33	0.136
PENG BG	33	0.136
SACCO R	33	0.136
SHERMAN M	33	0.136
SHIRAHA H	33	0.136
SUN C	33	0.136
TAKAHASHI Y	33	0.136
TAKITA M	33	0.136
UMESHITA K	33	0.136
WANG JJ	33	0.136
WANG XD	33	0.136
WU CY	33	0.136
WU G	33	0.136
WU L	33	0.136
XIA JC	33	0.136
XIE Y	33	0.136
XU W	33	0.136
YADA N	33	0.136
YANG C	33	0.136
YAO J	33	0.136
YAO YM	33	0.136
YUN JP	33	0.136
CHEN B	32	0.132
DONG L	32	0.132
FU J	32	0.132
FUJITA N	32	0.132
GAO L	32	0.132
GOLFIERI R	32	0.132
GUO L	32	0.132
HAYASHI M	32	0.132
HE L	32	0.132
HIRAOKA A	32	0.132
HUANG G	32	0.132
KUWAKI K	32	0.132
KWON CHD	32	0.132
LI JP	32	0.132
LI JQ	32	0.132
LI ZW	32	0.132
LIU JY	32	0.132
LU YY	32	0.132
MATSUYAMA Y	32	0.132
MINAMI T	32	0.132
MIYAYAMA S	32	0.132
NI RZ	32	0.132
NISHIE A	32	0.132
OOKA Y	32	0.132
PENG T	32	0.132
QU K	32	0.132
REN H	32	0.132
SAITOH S	32	0.132
TAKAHASHI M	32	0.132
TAKAKI A	32	0.132
UCHIYAMA H	32	0.132
WANG JY	32	0.132
WANG ZY	32	0.132
YE LH	32	0.132
YI NJ	32	0.132
ZOLI M	32	0.132
ARAI K	31	0.127
CAI MY	31	0.127
CAI XJ	31	0.127
CHEN TC	31	0.127
GUO W	31	0.127
HE XH	31	0.127
KATO M	31	0.127
KIM Y	31	0.127
KITAI S	31	0.127
KOBAYASHI Y	31	0.127
LEE M	31	0.127
LI JH	31	0.127
LI XW	31	0.127
LIU LX	31	0.127
LU MD	31	0.127
LU SC	31	0.127
MA KS	31	0.127
MIYAZAKI M	31	0.127
OCHIAI T	31	0.127
QIN WX	31	0.127
RAVAIOLI M	31	0.127
SAITO S	31	0.127
SATO K	31	0.127
SOTIROPOULOS GC	31	0.127
WANG JX	31	0.127
WANG SJ	31	0.127
WEI YG	31	0.127
WU JH	31	0.127
WU LM	31	0.127
XU B	31	0.127
XU H	31	0.127
YANG XM	31	0.127
ZHOU YM	31	0.127
AOKI T	30	0.123
AZOULAY D	30	0.123
BELGHITI J	30	0.123
CHAO Y	30	0.123
CHEN JY	30	0.123
CHERQUI D	30	0.123
FU Y	30	0.123
HAN ZG	30	0.123
HU ZB	30	0.123
HUANG SF	30	0.123
HUANG XH	30	0.123
ICHIDA T	30	0.123
INOUE M	30	0.123
ITO T	30	0.123
IZZO F	30	0.123
JANG JJ	30	0.123
JIANG HC	30	0.123
JIN YJ	30	0.123
KIM BH	30	0.123
LIU D	30	0.123
MIZUKOSHI E	30	0.123
NAKASHIMA O	30	0.123
OKA M	30	0.123
OKAMURA Y	30	0.123
REN N	30	0.123
SHEN Y	30	0.123
SHIAU CW	30	0.123
SONG GW	30	0.123
SUGIMACHI K	30	0.123
SUMINO Y	30	0.123
TAKEISHI K	30	0.123
WANG DS	30	0.123
WANG HL	30	0.123
WANG ZH	30	0.123
WONG VWS	30	0.123
YAMAMOTO S	30	0.123
YANG LY	30	0.123
YU E	30	0.123
ZHANG LJ	30	0.123
AHN CS	29	0.119
CHAU GY	29	0.119
CHEN XL	29	0.119
CHEN XY	29	0.119
CHIKAMOTO A	29	0.119
CHO EJ	29	0.119
GASBARRINI A	29	0.119
GUO WX	29	0.119
JIANG K	29	0.119
KANG YK	29	0.119
KE AW	29	0.119
KIM KA	29	0.119
KIM SS	29	0.119
LEE IJ	29	0.119
LEE PH	29	0.119
LI CY	29	0.119
LIU TT	29	0.119
MORIMOTO M	29	0.119
MORIWAKI H	29	0.119
NAHON P	29	0.119
RAPACCINI GL	29	0.119
SAKAI Y	29	0.119
SCHWARTZ M	29	0.119
SHIMIZU M	29	0.119
SINN DH	29	0.119
SONG Y	29	0.119
TAWADA A	29	0.119
WANG CY	29	0.119
WANG HM	29	0.119
WANG SY	29	0.119
WANG XQ	29	0.119
WU CH	29	0.119
XIE F	29	0.119
XU F	29	0.119
XUE TC	29	0.119
YAO DF	29	0.119
ZHANG QY	29	0.119
ZHANG YL	29	0.119
ZHAO P	29	0.119
ZHAO XL	29	0.119
CAO GW	28	0.115
CHEN WJ	28	0.115
CHEN YX	28	0.115
CHENG Y	28	0.115
FAN DM	28	0.115
FANG F	28	0.115
FUJII H	28	0.115
FURUSE J	28	0.115
GUO K	28	0.115
HA TY	28	0.115
HSIEH YH	28	0.115
JUNG DH	28	0.115
LEE H	28	0.115
LI ZH	28	0.115
LIU LL	28	0.115
LU JH	28	0.115
LU LG	28	0.115
MANNS MP	28	0.115
MASUZAKI R	28	0.115
MICHITAKA K	28	0.115
NAKAGAWA H	28	0.115
NAKANO M	28	0.115
PRIETO J	28	0.115
QIN Y	28	0.115
SATO T	28	0.115
SCHIRMACHER P	28	0.115
SHEN SQ	28	0.115
SUN B	28	0.115
TOH HC	28	0.115
TSUCHIYA K	28	0.115
VAUTHEY JN	28	0.115
VOGEL A	28	0.115
WANG HB	28	0.115
WANG HX	28	0.115
WANG JC	28	0.115
WANG ZG	28	0.115
WU C	28	0.115
WU T	28	0.115
WU YL	28	0.115
XIA F	28	0.115
YAMAKADO K	28	0.115
YANG GS	28	0.115
YANG HY	28	0.115
YANG PY	28	0.115
YUAN SX	28	0.115
ZHANG JL	28	0.115
ZHANG XJ	28	0.115
ZHANG XM	28	0.115
ZHAO YJ	28	0.115
ZHU L	28	0.115
ZHU Q	28	0.115
BEAUGRAND M	27	0.111
CAI J	27	0.111
CHAN AWH	27	0.111
CHEN XH	27	0.111
DANG YW	27	0.111
DENG L	27	0.111
DING YT	27	0.111
DONG H	27	0.111
FUKUDA K	27	0.111
GAO YZ	27	0.111
GESCHWIND JFH	27	0.111
HIRAMATSU N	27	0.111
JENG LB	27	0.111
KIM K	27	0.111
KWON JH	27	0.111
LI BK	27	0.111
LI JS	27	0.111
LIN H	27	0.111
LIN XJ	27	0.111
LIN YJ	27	0.111
LIU PH	27	0.111
MATSUDA M	27	0.111
ONJI M	27	0.111
PAN K	27	0.111
SANTORO A	27	0.111
SUN SH	27	0.111
TAKEDA K	27	0.111
TOMIMARU Y	27	0.111
UTSUNOMIYA T	27	0.111
WANG JB	27	0.111
WONG GLH	27	0.111
WONG N	27	0.111
WU LQ	27	0.111
XIE L	27	0.111
YAMAMOTO Y	27	0.111
YAO FY	27	0.111
YUEN MF	27	0.111
ZHANG HH	27	0.111
ZHANG JH	27	0.111
ZHAO W	27	0.111
ZHAO YF	27	0.111
ZHUANG SM	27	0.111
ASAHINA Y	26	0.107
CHEN GG	26	0.107
CHEN GH	26	0.107
CHEN MF	26	0.107
DENG Y	26	0.107
DING Y	26	0.107
DU Z	26	0.107
GUO YJ	26	0.107
HARADA N	26	0.107
HE H	26	0.107
HELLERBRAND C	26	0.107
IKEDA H	26	0.107
KAIBORI M	26	0.107
KAMIYAMA T	26	0.107
KATO N	26	0.107
KAWAKAMI Y	26	0.107
LEE HW	26	0.107
LI HL	26	0.107
LIANG LJ	26	0.107
LIANG Y	26	0.107
LIU SY	26	0.107
LIU YP	26	0.107
LU FM	26	0.107
LU L	26	0.107
LUO J	26	0.107
MASUDA T	26	0.107
MIZOKAMI M	26	0.107
NAULT JC	26	0.107
NGUYEN MH	26	0.107
SAKAIDA I	26	0.107
SIEGHART W	26	0.107
SUN Q	26	0.107
SUN X	26	0.107
TAI WT	26	0.107
TAKAKI S	26	0.107
TIAN Y	26	0.107
TORIMURA T	26	0.107
TORZILLI G	26	0.107
TSUJI K	26	0.107
VILGRAIN V	26	0.107
WANG SH	26	0.107
WEINMANN A	26	0.107
WONG CM	26	0.107
WU JX	26	0.107
WU XY	26	0.107
XUE F	26	0.107
YANG JD	26	0.107
YANG N	26	0.107
YANG S	26	0.107
YANG XY	26	0.107
YU XL	26	0.107
ZENG Z	26	0.107
ZHANG CH	26	0.107
ZHANG HL	26	0.107
ZHANG JQ	26	0.107
ZHANG WJ	26	0.107
ZHAO M	26	0.107
AWAI K	25	0.103
BAI T	25	0.103
BLANC JF	25	0.103
CAI H	25	0.103
CHANG Y	25	0.103
CHANG YJ	25	0.103
CHEN DS	25	0.103
CHEN JH	25	0.103
CHEN MH	25	0.103
CHEN WT	25	0.103
CHO SW	25	0.103
DUFOUR JF	25	0.103
FIEL MI	25	0.103
FORNER A	25	0.103
GAO YT	25	0.103
GUO QL	25	0.103
GUO XD	25	0.103
HAINAUT P	25	0.103
HAN HS	25	0.103
HAN J	25	0.103
HAN X	25	0.103
HAYASHI T	25	0.103
HUANG M	25	0.103
IMURA S	25	0.103
KANEOKA Y	25	0.103
KANG TW	25	0.103
KU Y	25	0.103
KUANG M	25	0.103
KUDO A	25	0.103
KUNG HF	25	0.103
KURODA S	25	0.103
LEE KT	25	0.103
LEE NP	25	0.103
LEE RC	25	0.103
LEE SK	25	0.103
LEE SS	25	0.103
LI CX	25	0.103
LI YJ	25	0.103
LI YP	25	0.103
LI YS	25	0.103
LI YW	25	0.103
LI YX	25	0.103
LIANG X	25	0.103
LIU P	25	0.103
LIU YJ	25	0.103
MAO YL	25	0.103
MORINE Y	25	0.103
NAKAMOTO Y	25	0.103
OMARY RA	25	0.103
PAN Y	25	0.103
PARK HS	25	0.103
SAITO Y	25	0.103
SAKAMOTO K	25	0.103
SATO S	25	0.103
SHI LH	25	0.103
SHIMIZU S	25	0.103
SUN XY	25	0.103
SUN YF	25	0.103
TAKEDA H	25	0.103
TAN YX	25	0.103
TANG L	25	0.103
TASHIRO H	25	0.103
TO KF	25	0.103
WANG DD	25	0.103
WANG WH	25	0.103
WANG YP	25	0.103
WANG YQ	25	0.103
WU X	25	0.103
XU JF	25	0.103
XU JJ	25	0.103
YAMASHIRO M	25	0.103
YAN W	25	0.103
YANG Q	25	0.103
YANG YP	25	0.103
YEN CJ	25	0.103
ZENG MS	25	0.103
ZHAI B	25	0.103
ZHANG HB	25	0.103
ZHANG JX	25	0.103
ZHANG K	25	0.103
ZHAO WX	25	0.103
BENVEGNU L	24	0.099
CHEN YB	24	0.099
CHENG Q	24	0.099
CRAXI A	24	0.099
CUI Y	24	0.099
DAWSON LA	24	0.099
ENOMOTO N	24	0.099
FENG L	24	0.099
FUJIWARA M	24	0.099
GANNE-CARRIE N	24	0.099
GAO HJ	24	0.099
GRAMANTIERI L	24	0.099
GRETEN TF	24	0.099
HE SQ	24	0.099
HUANG S	24	0.099
IMAMURA M	24	0.099
IRIE T	24	0.099
KIM GY	24	0.099
KIM JA	24	0.099
KIM SK	24	0.099
KULIK L	24	0.099
KUROSAKI M	24	0.099
LI ZF	24	0.099
LIN L	24	0.099
LIU SS	24	0.099
LIU WB	24	0.099
LIU XM	24	0.099
LU M	24	0.099
MA YY	24	0.099
MATSUI K	24	0.099
MIYAKE Y	24	0.099
NAKAO K	24	0.099
NISHIGUCHI S	24	0.099
PARADIS V	24	0.099
PARK SH	24	0.099
PARK YS	24	0.099
PENG ZW	24	0.099
QIN SK	24	0.099
RYU RK	24	0.099
SEO YS	24	0.099
SHEN YH	24	0.099
TANG B	24	0.099
WANG TT	24	0.099
WANG WJ	24	0.099
WU B	24	0.099
WU YH	24	0.099
YOSHIKAWA M	24	0.099
YOSHIKAWA T	24	0.099
ZHANG ZG	24	0.099
ZHENG H	24	0.099
ABOU-ALFA GK	23	0.095
ASAYAMA Y	23	0.095
BIOULAC-SAGE P	23	0.095
BURRA P	23	0.095
CHEN JG	23	0.095
CHEN S	23	0.095
CHEN XF	23	0.095
CHEN YH	23	0.095
CHEN YM	23	0.095
CHO Y	23	0.095
GE YS	23	0.095
GERKEN G	23	0.095
GIANNELLI G	23	0.095
GUO ZY	23	0.095
HE X	23	0.095
HE XX	23	0.095
HU J	23	0.095
HUANG Z	23	0.095
HUANG ZY	23	0.095
IGUCHI T	23	0.095
ISHIKO T	23	0.095
JI Y	23	0.095
JIN H	23	0.095
KASEB AO	23	0.095
KO GY	23	0.095
KUROMATSU R	23	0.095
LI HM	23	0.095
LI SL	23	0.095
LI SQ	23	0.095
LIN J	23	0.095
LIN Q	23	0.095
LING CQ	23	0.095
LIU LM	23	0.095
LIU QY	23	0.095
LIU XJ	23	0.095
LIU YL	23	0.095
LIU ZS	23	0.095
LIU ZW	23	0.095
NAKAMURA H	23	0.095
NAKAYAMA H	23	0.095
NISHIKAWA Y	23	0.095
NITTA H	23	0.095
ROAYAIE S	23	0.095
SETHI G	23	0.095
SHIN YM	23	0.095
SUN H	23	0.095
SUN HY	23	0.095
SUN T	23	0.095
TAKAMURA M	23	0.095
TAKEMURA S	23	0.095
TANABE M	23	0.095
TAOULI B	23	0.095
UEDA K	23	0.095
VAN VLIERBERGHE H	23	0.095
VERSLYPE C	23	0.095
WATANABE T	23	0.095
WU TJ	23	0.095
WU YM	23	0.095
XIAO H	23	0.095
YAMAMOTO H	23	0.095
YANG LX	23	0.095
YANG SL	23	0.095
YIN J	23	0.095
YOON SM	23	0.095
YOON YS	23	0.095
YOSHIDA T	23	0.095
ZHANG WD	23	0.095
ZHAO XY	23	0.095
ZHENG Q	23	0.095
ZHOU F	23	0.095
AOYAGI Y	22	0.09
BOUCHER E	22	0.09
CALVISI DF	22	0.09
CAMMA C	22	0.09
CAO L	22	0.09
CHAPMAN WC	22	0.09
CHEN ZH	22	0.09
CHENG SB	22	0.09
CHEONG JY	22	0.09
CHOO SP	22	0.09
DU Y	22	0.09
FENG Y	22	0.09
FORNARI F	22	0.09
GRAZI GL	22	0.09
HASSAN MM	22	0.09
HONG J	22	0.09
HSIEH CB	22	0.09
HUANG AL	22	0.09
IKEMOTO T	22	0.09
INARRAIRAEGUI M	22	0.09
ISHIDA T	22	0.09
ISHIGAMI K	22	0.09
ISHII H	22	0.09
JANG HS	22	0.09
JENG YM	22	0.09
JEONG SH	22	0.09
JIA L	22	0.09
JIN L	22	0.09
JUNG KH	22	0.09
KAYASHIMA H	22	0.09
KIM CM	22	0.09
KIM JY	22	0.09
LEE JMF	22	0.09
LI CH	22	0.09
LI JL	22	0.09
LI LJ	22	0.09
LIN CH	22	0.09
LIN KH	22	0.09
LIU CH	22	0.09
LIU JM	22	0.09
LUO RC	22	0.09
LV Z	22	0.09
MAEDA A	22	0.09
MAEDA S	22	0.09
MATSUURA B	22	0.09
MENG ZQ	22	0.09
MORIGUCHI M	22	0.09
NAKAGAWA S	22	0.09
NAKAJIMA T	22	0.09
NASU A	22	0.09
OCHI H	22	0.09
OKADA M	22	0.09
PAN ZY	22	0.09
PENG CH	22	0.09
PENG ZH	22	0.09
PINEAU P	22	0.09
QIAN J	22	0.09
RIMASSA L	22	0.09
SAITO K	22	0.09
SASAKI K	22	0.09
SATO KT	22	0.09
SHEN HB	22	0.09
SHIMIZU T	22	0.09
SHIRAKI K	22	0.09
SIEGEL AB	22	0.09
SONG TQ	22	0.09
SUN CY	22	0.09
SUNG KB	22	0.09
TANEMURA M	22	0.09
TOSHIMA T	22	0.09
TSUJITA E	22	0.09
WANG YT	22	0.09
WANG YX	22	0.09
WU FX	22	0.09
WU LL	22	0.09
YAMAMOTO N	22	0.09
YANG HS	22	0.09
YANG XL	22	0.09
YE F	22	0.09
YOKOO H	22	0.09
YOPP AC	22	0.09
YU HC	22	0.09
YU ML	22	0.09
YUAN Y	22	0.09
ZHANG CZ	22	0.09
ZHANG HJ	22	0.09
AUCEJO F	21	0.086
BABA HA	21	0.086
BUSUTTIL RW	21	0.086
CAI JQ	21	0.086
CAI L	21	0.086
CAI Y	21	0.086
CHAN KM	21	0.086
CHEN JJ	21	0.086
CHEN JW	21	0.086
CHEN LH	21	0.086
CHEN SY	21	0.086
CHOI J	21	0.086
DE MAN RA	21	0.086
DONG J	21	0.086
ENOOKU K	21	0.086
GESCHWIND JF	21	0.086
GUO CY	21	0.086
HAN GH	21	0.086
HE HW	21	0.086
HIDAKA S	21	0.086
HU C	21	0.086
HUANG Q	21	0.086
HUANG XD	21	0.086
IKEDA F	21	0.086
INOUE Y	21	0.086
ITO K	21	0.086
ITOH Y	21	0.086
JIANG N	21	0.086
KAMEL IR	21	0.086
KANEKO J	21	0.086
KAO JH	21	0.086
KIM SB	21	0.086
KOIKE M	21	0.086
KOMATSU S	21	0.086
KONG J	21	0.086
LAI CL	21	0.086
LEE CF	21	0.086
LI XQ	21	0.086
LI YF	21	0.086
LI YL	21	0.086
LIU JX	21	0.086
LU W	21	0.086
MA X	21	0.086
MERLE P	21	0.086
MILLER FH	21	0.086
MORITA K	21	0.086
MOTOYAMA T	21	0.086
NAKAMURA N	21	0.086
OKITA K	21	0.086
QIAN C	21	0.086
QIAO L	21	0.086
QU JH	21	0.086
RIAZ A	21	0.086
ROBERTS JP	21	0.086
SANG XT	21	0.086
SANO K	21	0.086
SHARMA R	21	0.086
SONG L	21	0.086
SU H	21	0.086
TAK WY	21	0.086
TAKAHASHI H	21	0.086
TAKEI Y	21	0.086
TAMAKI N	21	0.086
TATSUMI T	21	0.086
TIAN H	21	0.086
WANG CP	21	0.086
WANG JP	21	0.086
WANG QJ	21	0.086
WANG XF	21	0.086
WANG YG	21	0.086
WONG CCL	21	0.086
WORNS MA	21	0.086
WU DH	21	0.086
XU C	21	0.086
XUE J	21	0.086
YAMAMOTO T	21	0.086
YANG JL	21	0.086
YANG XJ	21	0.086
YANO H	21	0.086
YASUI K	21	0.086
YAU T	21	0.086
YEH CB	21	0.086
YEH MM	21	0.086
YU HP	21	0.086
ZEUZEM S	21	0.086
ZHANG CS	21	0.086
ZHANG G	21	0.086
ZHANG JF	21	0.086
ZHANG JN	21	0.086
ZHANG WG	21	0.086
ZHANG XW	21	0.086
ZHANG YW	21	0.086
ZHANG ZL	21	0.086
ZHAO HT	21	0.086
ZHU XL	21	0.086
AN J	20	0.082
BAKER T	20	0.082
BAN D	20	0.082
CHAN ATC	20	0.082
CHANG CC	20	0.082
CHEN CC	20	0.082
CHEN JS	20	0.082
CHOI HJ	20	0.082
CHOI JI	20	0.082
CHUNG AYF	20	0.082
CICCARESE F	20	0.082
DECAENS T	20	0.082
DEL POGGIO P	20	0.082
DOU CW	20	0.082
FANG Y	20	0.082
FINN RS	20	0.082
FOSCHI FG	20	0.082
FRIEDMAN SL	20	0.082
GARIN E	20	0.082
GUIU B	20	0.082
HE M	20	0.082
HE W	20	0.082
HE YF	20	0.082
HEO J	20	0.082
HUANG AM	20	0.082
HUYNH H	20	0.082
JANG ES	20	0.082
KAIDO T	20	0.082
KANG JH	20	0.082
KANG SH	20	0.082
KIM PN	20	0.082
KIM SW	20	0.082
LI LL	20	0.082
LI XF	20	0.082
LIANG TB	20	0.082
LIN YH	20	0.082
LIN ZZ	20	0.082
LIU XG	20	0.082
MAEDA T	20	0.082
NAKANISHI K	20	0.082
NINOMIYA T	20	0.082
NODA T	20	0.082
PAN SH	20	0.082
PENG W	20	0.082
QU LS	20	0.082
REIG M	20	0.082
REN WH	20	0.082
SAITO H	20	0.082
SAMUEL D	20	0.082
SHEN Q	20	0.082
SHEN ZY	20	0.082
SU J	20	0.082
TAKEDA S	20	0.082
TANG Y	20	0.082
TIAN DA	20	0.082
TOSO C	20	0.082
UEDA M	20	0.082
UEDA T	20	0.082
WAKI K	20	0.082
WANG JG	20	0.082
WANG LJ	20	0.082
WANG SM	20	0.082
WANG SN	20	0.082
WANG WQ	20	0.082
WANG YS	20	0.082
WANG ZC	20	0.082
WU HC	20	0.082
WU M	20	0.082
XIA JL	20	0.082
XU XS	20	0.082
XU Z	20	0.082
YAGI T	20	0.082
YAMADA T	20	0.082
YAN B	20	0.082
YAN ZL	20	0.082
YAN ZP	20	0.082
YANG JH	20	0.082
YEH KT	20	0.082
YIM HJ	20	0.082
YIN ZF	20	0.082
YU Q	20	0.082
ZHANG CL	20	0.082
ZHANG MY	20	0.082
ZHANG YC	20	0.082
ZHANG ZH	20	0.082
ZHOU HJ	20	0.082
ZHOU P	20	0.082
ZHOU XY	20	0.082
ZHU SL	20	0.082
ZHU X	20	0.082
ABECASSIS M	19	0.078
AHN KS	19	0.078
BARBARE JC	19	0.078
BRONOWICKI JP	19	0.078
CALDERARO J	19	0.078
CHANG KC	19	0.078
CHEN HW	19	0.078
CHEN LJ	19	0.078
CHIANG JH	19	0.078
CHISHINA H	19	0.078
CHOI SH	19	0.078
CHOI Y	19	0.078
COSTANTINI S	19	0.078
DAI CY	19	0.078
DONG X	19	0.078
FUKUHARA T	19	0.078
GAMBLIN TC	19	0.078
GE NL	19	0.078
GUO C	19	0.078
HONDA Y	19	0.078
HSU HC	19	0.078
HU BS	19	0.078
HU L	19	0.078
HU X	19	0.078
HUANG JL	19	0.078
HUANG X	19	0.078
HUANG ZL	19	0.078
IJZERMANS JNM	19	0.078
IKEDA T	19	0.078
JENG WJ	19	0.078
JIANG JL	19	0.078
JIANG X	19	0.078
JOHNSON PJ	19	0.078
KATO T	19	0.078
KAY CS	19	0.078
KEE KM	19	0.078
KIM DS	19	0.078
KOIZUMI Y	19	0.078
LAO XM	19	0.078
LEE DS	19	0.078
LEE DY	19	0.078
LEE JI	19	0.078
LEE SY	19	0.078
LI CP	19	0.078
LI GC	19	0.078
LI JY	19	0.078
LI QJ	19	0.078
LI SH	19	0.078
LI WH	19	0.078
LI XD	19	0.078
LI XJ	19	0.078
LIANG L	19	0.078
LIN M	19	0.078
LIU HL	19	0.078
LIU SP	19	0.078
LIU ZM	19	0.078
LONG J	19	0.078
LONG XD	19	0.078
LU N	19	0.078
LU S	19	0.078
MAJNO P	19	0.078
MARTIN RCG	19	0.078
MIZUTA T	19	0.078
MOGUSHI K	19	0.078
NAGAI H	19	0.078
NAKAMURA M	19	0.078
NAKANUMA Y	19	0.078
NAKAZAWA T	19	0.078
NAN KJ	19	0.078
NEUHAUS P	19	0.078
OKADA H	19	0.078
OTTO G	19	0.078
PARK GC	19	0.078
PENG Y	19	0.078
PINTER M	19	0.078
RONCALLI M	19	0.078
SAKAI H	19	0.078
SAKAMOTO T	19	0.078
SATO Y	19	0.078
SCHWARTZ ME	19	0.078
SHEN SL	19	0.078
SONG K	19	0.078
SUH DJ	19	0.078
TAI MH	19	0.078
TAKEDA Y	19	0.078
TAKEUCHI Y	19	0.078
TAMESA T	19	0.078
TAN Y	19	0.078
TAURA K	19	0.078
TERAI S	19	0.078
TU JF	19	0.078
WAKAI T	19	0.078
WANG HQ	19	0.078
WANG SB	19	0.078
WANG YD	19	0.078
WANG ZJ	19	0.078
WANG ZW	19	0.078
WATANABE S	19	0.078
WEI Q	19	0.078
WEN J	19	0.078
WON HJ	19	0.078
XU T	19	0.078
XU ZF	19	0.078
YAMAGIWA S	19	0.078
YAMAGUCHI T	19	0.078
YAMASAKI T	19	0.078
YIN ZY	19	0.078
YOON HK	19	0.078
YOSHIMITSU K	19	0.078
YOU SL	19	0.078
YOU XM	19	0.078
YU M	19	0.078
ZHANG MF	19	0.078
ZHANG XH	19	0.078
ZHANG ZM	19	0.078
ZHAO R	19	0.078
ZHENG J	19	0.078
ZHOU M	19	0.078
ZHOU S	19	0.078
ZHU F	19	0.078
ZHU GZ	19	0.078
ZHU MH	19	0.078
ZOU RH	19	0.078
ADAM R	18	0.074
AKKIZ H	18	0.074
ALSINET C	18	0.074
ARAKAWA Y	18	0.074
ASAOKA Y	18	0.074
BARGELLINI I	18	0.074
BHOORI S	18	0.074
CAI XY	18	0.074
CASTELLO G	18	0.074
CHEN LM	18	0.074
CHEN SL	18	0.074
CHEN YT	18	0.074
CHO SB	18	0.074
CHOI JW	18	0.074
CHOI SY	18	0.074
CHUN HJ	18	0.074
CUI XP	18	0.074
DAI WC	18	0.074
DONADON M	18	0.074
FANG M	18	0.074
GAO C	18	0.074
GAO X	18	0.074
GONG JP	18	0.074
GU J	18	0.074
GU JX	18	0.074
HAGIHARA H	18	0.074
HAN Y	18	0.074
HAN ZY	18	0.074
HE XS	18	0.074
HIGAKI T	18	0.074
HIRAKAWA M	18	0.074
HORI M	18	0.074
HUANG B	18	0.074
HUANG T	18	0.074
HUANG XL	18	0.074
IIJIMA H	18	0.074
IIZUKA N	18	0.074
INOKAWA Y	18	0.074
ISHIZAWA T	18	0.074
JANG JY	18	0.074
JIA YL	18	0.074
KANTO T	18	0.074
KAWAGUCHI T	18	0.074
KIM D	18	0.074
KIM R	18	0.074
KIM T	18	0.074
KONG LQ	18	0.074
LANG H	18	0.074
LEE JD	18	0.074
LEE MS	18	0.074
LEI JY	18	0.074
LI MX	18	0.074
LI SY	18	0.074
LIM DH	18	0.074
LIN CW	18	0.074
LIN YM	18	0.074
LIN ZH	18	0.074
LIN ZX	18	0.074
LIU YC	18	0.074
LIU YQ	18	0.074
LV J	18	0.074
LV L	18	0.074
MISSALE G	18	0.074
MORIYASU F	18	0.074
MOTOMURA T	18	0.074
NAKAYAMA G	18	0.074
NAM SW	18	0.074
NISHIJIMA N	18	0.074
NOZAKI A	18	0.074
OBI S	18	0.074
OOI LLPJ	18	0.074
OTSUJI E	18	0.074
PARK JO	18	0.074
PARK MJ	18	0.074
PARK Y	18	0.074
PAUL A	18	0.074
PENG JR	18	0.074
PIIPER A	18	0.074
PINATO DJ	18	0.074
QIU JL	18	0.074
SAITO M	18	0.074
SCHEMMER P	18	0.074
SEROR O	18	0.074
SHEEN IS	18	0.074
SHIMODA M	18	0.074
SONG B	18	0.074
SUI CJ	18	0.074
SUNG JJY	18	0.074
SUZUKI K	18	0.074
SUZUKI S	18	0.074
TROJAN J	18	0.074
UEMURA M	18	0.074
WANG CM	18	0.074
WANG JM	18	0.074
WANG LL	18	0.074
WANG SC	18	0.074
WANG SS	18	0.074
WANG YM	18	0.074
WANG YZ	18	0.074
WEI J	18	0.074
WEI XY	18	0.074
WU K	18	0.074
WU XZ	18	0.074
WU YY	18	0.074
XIE J	18	0.074
XU Q	18	0.074
YANG P	18	0.074
YANG XW	18	0.074
YI Y	18	0.074
YIN L	18	0.074
YU CY	18	0.074
YU JH	18	0.074
YU S	18	0.074
ZEN Y	18	0.074
ZHANG BX	18	0.074
ZHANG HF	18	0.074
ZHANG JW	18	0.074
ZHANG QB	18	0.074
ZHANG SS	18	0.074
ZHANG XB	18	0.074
ZHANG YM	18	0.074
ZHANG ZZ	18	0.074
ZHAO N	18	0.074
ZHENG F	18	0.074
ZHENG MH	18	0.074
ZHOU W	18	0.074
ZHOU YQ	18	0.074
ZHOU YY	18	0.074
ZHOU ZG	18	0.074
ZHUANG PY	18	0.074
ABDEL-RAHMAN O	17	0.07
BECKEBAUM S	17	0.07
CARRILHO FJ	17	0.07
CHAI ZT	17	0.07
CHAN THM	17	0.07
CHEN LY	17	0.07
CHEN LZ	17	0.07
CHEN SG	17	0.07
CHEN SH	17	0.07
CHEN SS	17	0.07
CHEN YP	17	0.07
CHENG C	17	0.07
CHOI SB	17	0.07
CHU PY	17	0.07
CHUA MS	17	0.07
CHUNG H	17	0.07
CUI JF	17	0.07
DAI Y	17	0.07
DI MARCO M	17	0.07
DONG LW	17	0.07
DONG XY	17	0.07
EDELINE J	17	0.07
FACCIORUSSO A	17	0.07
FAN H	17	0.07
FAN YC	17	0.07
FENG XB	17	0.07
FUNG J	17	0.07
GAO W	17	0.07
GONG J	17	0.07
GONG L	17	0.07
GUO XL	17	0.07
HA SY	17	0.07
HE K	17	0.07
HIGASHI T	17	0.07
HO MC	17	0.07
HSIEH MJ	17	0.07
HUANG CC	17	0.07
IKOMA H	17	0.07
ISHIKAWA M	17	0.07
ISHIZAKI M	17	0.07
IWAMOTO H	17	0.07
JANG MK	17	0.07
JIN F	17	0.07
JIN J	17	0.07
JUNG SH	17	0.07
KANDA T	17	0.07
KANOGAWA N	17	0.07
KAO WY	17	0.07
KATO J	17	0.07
KAWADA N	17	0.07
KIM M	17	0.07
KIM SG	17	0.07
KOGA H	17	0.07
KOJIRO M	17	0.07
KUBOTA T	17	0.07
KULIK LM	17	0.07
LA VECCHIA C	17	0.07
LI HG	17	0.07
LI JB	17	0.07
LI JW	17	0.07
LI QY	17	0.07
LI XX	17	0.07
LI YG	17	0.07
LIM SG	17	0.07
LIN C	17	0.07
LIN PY	17	0.07
LIN S	17	0.07
LIU GJ	17	0.07
LIU JG	17	0.07
LIU N	17	0.07
LIU QQ	17	0.07
LIU TH	17	0.07
LIU XB	17	0.07
LIU YB	17	0.07
LIU YW	17	0.07
LONGERICH T	17	0.07
LU P	17	0.07
LU Q	17	0.07
MA H	17	0.07
MATSUDA Y	17	0.07
MATSUMURA S	17	0.07
MIYAAKI H	17	0.07
MORISCO F	17	0.07
MULLER C	17	0.07
MURAKAMI Y	17	0.07
NAKANISHI H	17	0.07
NAKATSURA T	17	0.07
NANASHIMA A	17	0.07
OJIMA H	17	0.07
PAN Q	17	0.07
PARK JB	17	0.07
PENG L	17	0.07
PENG YF	17	0.07
POMPILI M	17	0.07
QI XS	17	0.07
QIN CY	17	0.07
QIN J	17	0.07
QIU LW	17	0.07
QIU YD	17	0.07
ROSMORDUC O	17	0.07
SANTELLA RM	17	0.07
SEEHOFER D	17	0.07
SHEN H	17	0.07
SHEN YC	17	0.07
SHIMADA K	17	0.07
SHINDOH J	17	0.07
SONG KD	17	0.07
SONG W	17	0.07
SU CQ	17	0.07
SUNAGOZAKA H	17	0.07
TAJIMA T	17	0.07
TANAKA J	17	0.07
TAO KS	17	0.07
TAURA N	17	0.07
THIMME R	17	0.07
TIAN L	17	0.07
TIAN ZG	17	0.07
TSAI FJ	17	0.07
TSAI MC	17	0.07
UENO H	17	0.07
VOGL TJ	17	0.07
WANG JN	17	0.07
WANG WW	17	0.07
WANG ZS	17	0.07
WENG DS	17	0.07
WONG J	17	0.07
WONG KF	17	0.07
WONG RJ	17	0.07
WU JY	17	0.07
WU PH	17	0.07
WU XL	17	0.07
XIAO L	17	0.07
XIAO YS	17	0.07
XIE Q	17	0.07
XING BC	17	0.07
XIONG J	17	0.07
XU XY	17	0.07
XU YF	17	0.07
YANAGA K	17	0.07
YANG G	17	0.07
YASUCHIKA K	17	0.07
YE JZ	17	0.07
YEN YH	17	0.07
YEON JE	17	0.07
YIN Y	17	0.07
YU C	17	0.07
ZENG YY	17	0.07
ZHANG XQ	17	0.07
ZHAO G	17	0.07
ZHAO JM	17	0.07
ZHAO JY	17	0.07
ZHAO YM	17	0.07
ZHENG JS	17	0.07
ZHENG SG	17	0.07
ZHOU H	17	0.07
ZHU HQ	17	0.07
ZHU W	17	0.07
BAE JS	16	0.066
BAYRAM S	16	0.066
BERNARDI M	16	0.066
BREUHAHN K	16	0.066
BROWN RS	16	0.066
CHEN JX	16	0.066
CHEN T	16	0.066
CHEN XZ	16	0.066
CHEN YW	16	0.066
CHEN ZY	16	0.066
CHENG ZG	16	0.066
CHIARAMONTE M	16	0.066
CHO HJ	16	0.066
CHOU CT	16	0.066
CHOU HS	16	0.066
CHUNG RT	16	0.066
CLEMENT B	16	0.066
DAVILA JA	16	0.066
DONG W	16	0.066
DUVOUX C	16	0.066
ENDO I	16	0.066
FARTOUX L	16	0.066
FENG YB	16	0.066
FU SJ	16	0.066
GOH BKP	16	0.066
GORES GJ	16	0.066
GRAUBARD BI	16	0.066
GU X	16	0.066
GUO J	16	0.066
GUO ZJ	16	0.066
HAN B	16	0.066
HE RQ	16	0.066
HEIKENWALDER M	16	0.066
HOU J	16	0.066
HU CX	16	0.066
HU ML	16	0.066
HUANG CH	16	0.066
IAVARONE M	16	0.066
ISHII T	16	0.066
ISHIZUKA M	16	0.066
JANG HJ	16	0.066
JARNAGIN WR	16	0.066
JIANG CP	16	0.066
JIANG YY	16	0.066
JIN X	16	0.066
KAKIZAWA H	16	0.066
KANG XN	16	0.066
KAO CH	16	0.066
KATO A	16	0.066
KAWASAKI H	16	0.066
KEW MC	16	0.066
KIM DH	16	0.066
KIM DJ	16	0.066
KIM N	16	0.066
KONISHI H	16	0.066
KONO M	16	0.066
KUMAR AP	16	0.066
KUO WH	16	0.066
LARSON AC	16	0.066
LEE FY	16	0.066
LEE MJ	16	0.066
LI GQ	16	0.066
LI ZQ	16	0.066
LIANG HH	16	0.066
LIANG XH	16	0.066
LIN SY	16	0.066
LIOU JY	16	0.066
LIU CL	16	0.066
LIU FF	16	0.066
LIU LP	16	0.066
LIU XX	16	0.066
LIU YM	16	0.066
LIU YX	16	0.066
LIU ZH	16	0.066
LU D	16	0.066
LUCIANI A	16	0.066
MALFERTHEINER P	16	0.066
MAO M	16	0.066
MASAKI T	16	0.066
MATSUMOTO T	16	0.066
MO F	16	0.066
MORI H	16	0.066
NAKAMURA K	16	0.066
NAKANISHI M	16	0.066
NISHIMURA T	16	0.066
OHKI T	16	0.066
PENG C	16	0.066
QIU XQ	16	0.066
RONG WQ	16	0.066
ROSSI M	16	0.066
RYOO BY	16	0.066
SAHANI DV	16	0.066
SANGIOVANNI A	16	0.066
SASAKI Y	16	0.066
SCATTON O	16	0.066
SCHLITT HJ	16	0.066
SHIBUYA A	16	0.066
SHINKAWA H	16	0.066
SONG J	16	0.066
SONG MJ	16	0.066
SPOSITO C	16	0.066
SUDA T	16	0.066
SUMIE S	16	0.066
SUZUKI H	16	0.066
SUZUKI T	16	0.066
TAKAKI H	16	0.066
TAMORI A	16	0.066
TIAN F	16	0.066
USHIJIMA Y	16	0.066
WAKUI N	16	0.066
WANG MJ	16	0.066
WANG QF	16	0.066
WANG QL	16	0.066
WANG WM	16	0.066
WANG XP	16	0.066
WANG YW	16	0.066
WATANABE H	16	0.066
WU TH	16	0.066
XIA YJ	16	0.066
[truncated: 53,933 more rows]
